# Supplementary material for: Associations between maternal size and health outcomes for women undergoing caesarean section: a multicentre prospective observational study (The MUM SIZE Study)
Source: PubMed Central journal article supplement — BMJ Open. 2017 Jun 30;7(6):e015630. doi: 10.1136/bmjopen-2016-015630 (PMC5734348; doi:10.1136/bmjopen-2016-015630), 2017-06-30
Supplement: bmjopen-2016-015630.draft_revisions.pdf [file bmjopen-2016-015630.draft_revisions.pdf]

# BMJ Open

## Associations between maternal size and health outcomes for women undergoing for caesarean section: a multicentre prospective observational study (The MUM SIZE Study)

|                                 |                                                                                                                                                                                                                                                                                                                                                                                                                                                                                                                                                                                                                                                                                                                                                                                                                                                                                                                                                                                          |
|---------------------------------|------------------------------------------------------------------------------------------------------------------------------------------------------------------------------------------------------------------------------------------------------------------------------------------------------------------------------------------------------------------------------------------------------------------------------------------------------------------------------------------------------------------------------------------------------------------------------------------------------------------------------------------------------------------------------------------------------------------------------------------------------------------------------------------------------------------------------------------------------------------------------------------------------------------------------------------------------------------------------------------|
| Journal:                        | <i>BMJ Open</i>                                                                                                                                                                                                                                                                                                                                                                                                                                                                                                                                                                                                                                                                                                                                                                                                                                                                                                                                                                          |
| Manuscript ID                   | bmjopen-2016-015630                                                                                                                                                                                                                                                                                                                                                                                                                                                                                                                                                                                                                                                                                                                                                                                                                                                                                                                                                                      |
| Article Type:                   | Research                                                                                                                                                                                                                                                                                                                                                                                                                                                                                                                                                                                                                                                                                                                                                                                                                                                                                                                                                                                 |
| Date Submitted by the Author:   | 22-Dec-2016                                                                                                                                                                                                                                                                                                                                                                                                                                                                                                                                                                                                                                                                                                                                                                                                                                                                                                                                                                              |
| Complete List of Authors:       | Dennis, Alicia; The Royal Women's Hospital, Anaesthesia<br>Lamb, Karen; Deakin University, Institute for Physical Activity and Nutrition (IPAN)<br>Story, David; The University of Melbourne , Perioperative and Pain Medicine Unit, Melbourne Medical School<br>Tew, Michelle; The University of Melbourne , Health Economics Unit, Centre for Health Policy<br>Dalziel, Kim; The University of Melbourne, Health Economics Unit, Centre for Health Policy<br>Clarke, Philip; University of Melbourne, Health Economics Unit, Centre for Health Policy<br>Lew, Jospeh; The Northern Hosptial, Anaesthesia<br>Hessian, Elizabeth; Western Health , Anaesthesia and Pain Medicine<br>Parker, Anna; The University of Melbourne , Perioperative and Pain Medicine Unit, Melbourne Medical School<br>Teale, Gyn; Western Health , Women's and Children's ServicesMedicine<br>Simmons, Scott; Mercy Hospital for Women , Anaesthesia<br>Casalaz, Dan; Mercy Hospital for Women , Neonatology |
| <b>Primary Subject Heading</b>: | Anaesthesia                                                                                                                                                                                                                                                                                                                                                                                                                                                                                                                                                                                                                                                                                                                                                                                                                                                                                                                                                                              |
| Secondary Subject Heading:      | Obstetrics and gynaecology                                                                                                                                                                                                                                                                                                                                                                                                                                                                                                                                                                                                                                                                                                                                                                                                                                                                                                                                                               |
| Keywords:                       | caesarean section, obesity, HEALTH ECONOMICS, Quality in health care < HEALTH SERVICES ADMINISTRATION & MANAGEMENT                                                                                                                                                                                                                                                                                                                                                                                                                                                                                                                                                                                                                                                                                                                                                                                                                                                                       |
|                                 |                                                                                                                                                                                                                                                                                                                                                                                                                                                                                                                                                                                                                                                                                                                                                                                                                                                                                                                                                                                          |

SCHOLARONE™  
Manuscripts

1  
2 **Associations between maternal size and health outcomes for women undergoing for caesarean section:**  
3 **a multicentre prospective observational study (The MUM SIZE Study)\***  
4

5  
6 Dennis A.T.<sup>1</sup>, Lamb K.E.<sup>2</sup>, Story D<sup>3</sup>, Tew, M<sup>4</sup>, Dalziel K<sup>5</sup>, Clarke P<sup>6</sup>, Lew J<sup>7</sup>, Parker A<sup>8</sup>, Hessian E<sup>9</sup>, Teale  
7 G1<sup>10</sup>, Simmons S<sup>11</sup>, Casalaz D<sup>12</sup> on behalf of the MUM SIZE Investigators\*

8  
9  
10 Address for each author and position

11  
12 <sup>1</sup> MBBS, PhD, PGDipEcho, FANZCA, Associate Professor, Department of Obstetrics and Gynaecology and  
13 Department of Pharmacology, The University of Melbourne, Director of Anaesthesia Research, Staff  
14 Specialist Anaesthetist, Department of Anaesthesia, The Royal Women's Hospital, Locked Bag 300, Cnr  
15 Flemington Rd & Grattan St, Parkville, Victoria 3052, Australia

16  
17 [alicia.dennis@thewomens.org.au](mailto:alicia.dennis@thewomens.org.au)

18  
19  
20  
21 <sup>2</sup> BSc (Hons) PhD, Biostatistician and Research Fellow, Institute for Physical Activity and Nutrition (IPAN),  
22 School of Exercise & Nutrition Science, Deakin University, Burwood, Australia [karen.lamb@deakin.edu.au](mailto:karen.lamb@deakin.edu.au)  
23 AND Department of Paediatrics, The University of Melbourne, Parkville, Australia

24  
25  
26  
27 <sup>3</sup> MBBS, MD, BMedSci, FANZCA, Chair of Anaesthesia and Head of Anaesthesia, Perioperative and Pain  
28 Medicine Unit, Melbourne Medical School, The University of Melbourne [dastory@unimelb.edu.au](mailto:dastory@unimelb.edu.au)

29  
30  
31  
32 <sup>4</sup> MPH MPharm, Research Assistant, Health Economics Unit, Centre for Health Policy, The University of  
33 Melbourne [michelle.tew@unimelb.edu.au](mailto:michelle.tew@unimelb.edu.au)

34  
35  
36  
37 <sup>5</sup> B.Health.Sc (hons), M.Health.Econ, PhD Research Fellow, Health Economics Unit, Centre for Health  
38 Policy, The University of Melbourne [kim.dalziel@unimelb.edu.au](mailto:kim.dalziel@unimelb.edu.au)

39  
40  
41  
42 <sup>6</sup> BEc, Mec, PhD, Chair of Health Economics, Health Economics Unit, Centre for Health Policy, The  
43 University of Melbourne [philip.clarke@unimelb.edu.au](mailto:philip.clarke@unimelb.edu.au)

44  
45  
46  
47 <sup>7</sup> MBBS, FANZCA Staff Anaesthetist, The Northern Hospital [joseph.lew@nh.org.au](mailto:joseph.lew@nh.org.au)

48  
49  
50  
51 <sup>8</sup> MBBS, MPH, FANZCA, Deputy Director and Head of Anaesthesia Research Department of  
52 Anaesthesia and Pain Medicine, Western Health [Elizabeth.Hessian@mh.org.au](mailto:Elizabeth.Hessian@mh.org.au)

53  
54  
55  
56  
57 <sup>9</sup> MA, MBioeth, BA, Manager, Anaesthesia Perioperative and Pain Medicine Unit, The University  
58 of Melbourne [anna.parker@unimelb.edu.au](mailto:anna.parker@unimelb.edu.au)

1  
2  
3  
4  
5  
6  
7  
8  
9  
10  
11  
12  
13  
14  
15  
16  
17  
18  
19  
20  
21  
22  
23  
24  
25  
26  
27  
28  
29  
30  
31  
32  
33  
34  
35  
36  
37  
38  
39  
40  
41  
42  
43  
44  
45  
46  
47  
48  
49  
50  
51  
52  
53  
54  
55  
56  
57  
58  
59  
60

<sup>10</sup>MRCGP, MRCOG, MD, FRANZCOG, Specialist Obstetrician and Gynaecologist, Clinical Services Director, Women's and Children's Services Sunshine Hospital, Western Health, [Glyn.Teale@wh.org.au](mailto:Glyn.Teale@wh.org.au)

<sup>11</sup>BMBS, FANZCA, BSc, MBA, Director of Anaesthesia, Mercy Hospital for Women  
[SSimmons@mercy.com.au](mailto:SSimmons@mercy.com.au)

<sup>12</sup>MBBS, MpubHlth, MRCPCH, FRACP, Specialist in Neonatology and Perinatology, Mercy Hospital for Women, Heidelberg, [DCasalaz@mercy.com.au](mailto:DCasalaz@mercy.com.au)

\*See acknowledgements

Author responsible for reprints: A/Prof Alicia Dennis Royal Women's Hospital, Locked Bag 300, Corner Flemington Road and Grattan Street, Parkville Victoria 2052, Australia  
[alicia.dennis@thewomens.org.au](mailto:alicia.dennis@thewomens.org.au)

Author responsible for correspondence: A/Prof Alicia Dennis Royal Women's Hospital, Locked Bag 300, Corner Flemington Road and Grattan Street, Parkville Victoria 3052, Australia  
Telephone: +61 3 8345 231  
Fax number: +61 3 8345 2379  
Mobile number: +61 407 685 054  
E: [alicia.dennis@thewomens.org.au](mailto:alicia.dennis@thewomens.org.au)

**Short title:** Associations between maternal size and outcomes for caesarean section

\*This work was presented in part at the Australian and New Zealand College of Anaesthetists (ANZCA) Annual Scientific Meeting in Auckland New Zealand, May 2016 Obstetric Anaesthetists' Association (OAA) Meeting Manchester UK May 2016 and the Society of Obstetric Anesthesiologists and Perinatologists (SOAP) Meeting in Boston in May 2016

**Structured Abstract**

**Objectives:** to investigate associations between maternal body mass index (BMI) at delivery (using pregnancy specific BMI cut-off values 5 kg/m<sup>2</sup> higher in each of the World Health Organization groups) and clinical, theatre utilization and health economic outcomes for women undergoing CS.

**Design:** A prospective multicentre observational study

**Setting:** Seven secondary or tertiary referral obstetric hospitals

**Participants:** 1,457 women undergoing all categories of CS.

**Data collection:** Height and weight were recorded at the initial antenatal visit and at delivery. We analysed the associations between delivery BMI (continuous and pregnancy specific cut-off values) and total theatre time, surgical time, anaesthesia time, maternal and neonatal adverse outcomes, total hospital admission, and theatre, costs.

**Results:** Mean participant characteristics were: age 32 years, gestation at delivery 38.4 weeks, and delivery BMI 32.2 kg/m<sup>2</sup>. Fifty-five percent of participants were overweight, obese or super-obese using delivery pregnancy specific BMI cut-off values. As BMI increased, total theatre time, surgical time and anaesthesia time increased. Super-obese participants had approximately 27% (17 minutes, p <0.001) longer total theatre time, 20% (9 minutes, p <0.001), longer surgical time and 40% (11 minutes, p <0.001) longer anaesthesia time when compared with normal BMI participants. Increased BMI at delivery was associated with increased risk of maternal intensive care unit admission (relative risk 1.07 p = 0.045) but no increased risk of neonatal admission to higher acuity care. Total hospital admission costs were 15% higher in super-obese women compared with normal BMI women and theatre costs were 27% higher in super-obese women.

**Conclusions:** Increased maternal BMI was associated with increased total theatre time, surgical and anaesthesia time, increased total hospital admission costs and theatre costs. Clinicians and health administrators should consider these clinical risks, time implications and financial costs when managing pregnant women.

**Strengths and limitations of this study**

- Large multicentre prospective study
- Broad representation of hospitals: two tertiary maternity, two urban general, three regional/rural
- First prospective study examining associations between BMI and clinical, time and economic outcomes
- All women undergoing caesarean section included
- We were not able to determine the cause of the increased time

## Introduction

Obesity in women of child bearing age, in high income counties, is a major global health issue. The World Health Organization (WHO) uses the body mass index (BMI) to define categories of size in adults; underweight, normal, overweight, obese (subdivided in to class I, II) and super-obese (class III). BMI is defined a person's weight in kilograms divided by the square of their height in metres ( $\text{kg}/\text{m}^2$ ). WHO uses a BMI of  $\geq 25.0$  to  $29.9 \text{ kg}/\text{m}^2$  to define overweight, a BMI value of  $30.0$  to  $39.9 \text{ kg}/\text{m}^2$  to define obesity (class I and II) and a BMI value of  $\geq 40.0 \text{ kg}/\text{m}^2$  to define super-obesity (class III).<sup>1</sup> Using these BMI categories, the obesity rate in women of childbearing age has increased in high income countries from 16% in 1993 to 24% in 2007.<sup>2</sup>

In pregnancy, an increased BMI is associated with adverse pregnancy outcomes including venous thromboembolism, pre-eclampsia, postpartum haemorrhage, and maternal death.<sup>2-5</sup> During pregnancy however, due to the normal maternal weight gain of 10 to 17 kg, BMI will often naturally increase but this is rarely taken into account in studies of BMI and pregnancy. These studies usually only refer to pre-pregnancy BMI or early pregnancy BMI values such as clinic booking BMI. Further, use of non-pregnant BMI categories leads to over-representation of overweight or obese women in studies undermining analysis of the risks of obesity.<sup>6</sup> These limitations in using non-pregnant metrics at delivery has prompted groups to suggest that pregnancy specific BMI cut-off values be considered with a BMI of  $35 \text{ kg}/\text{m}^2$  or greater as a threshold for obesity at delivery rather than  $\geq 30 \text{ kg}/\text{m}^2$ .<sup>27,8</sup> Following on from defining delivery obesity (class I and II) as a BMI of  $\geq 35 \text{ kg}/\text{m}^2$ , a logical extension is to define delivery super-obesity (class III) as a BMI  $\geq 45 \text{ kg}/\text{m}^2$ .

Regardless of problems in formally defining obesity at delivery, the rates of obesity in pregnancy are increasing and coupled with this are increasing caesarean section rates especially in women with increased BMI  $\geq 25.0 \text{ kg}/\text{m}^2$ .<sup>3,9</sup> When combined with increasing maternal size, the risks associated with caesarean section may be increased leading to adverse maternal and neonatal outcomes, increased total theatre times, and increased hospital costs. While there is considerable literature about obesity during pregnancy and post-delivery outcomes<sup>3</sup> there are fewer reports on obesity and caesarean section. One small ( $n=100$ ) single centre retrospective study from the United States suggested that total theatre times were increased for women undergoing caesarean section with BMI  $\geq 40 \text{ kg}/\text{m}^2$  compared with women with a lower BMI.<sup>10</sup> While clinicians have greater experience in safely caring for obese and super-obese women, anecdotal reports indicate that increased duration of caesarean section for obese women adversely affects operating theatre suite planning and theatre utilization, and may have resource implications. There are, however, no quantitative data on these effects.

The aim of this study was to investigate the association between maternal size at delivery using pregnancy specific BMI cut-off values and clinical (maternal and neonatal), theatre utilization and health economic

1 outcomes for women undergoing caesarean section. We aimed to determine if pregnancy specific BMI cut-  
2 off values of 35 kg/m<sup>2</sup> for obesity and 45 kg/m<sup>2</sup> for super-obesity are appropriate to assist planning around  
3 the time of delivery including resource allocation and theatre scheduling. Our primary hypothesis was that  
4 maternal obesity is associated with increased total theatre time. Our secondary hypotheses were that maternal  
5 obesity is associated with increased anaesthesia time, increased surgical time, increased length of hospital  
6 stay, increased use of intensive care services for women and neonatal services for babies, and increased  
7 hospital costs.  
8  
9  
10  
11  
12

## 13 **Methods**

### 14 *Study participants*

15 A prospective multicentre observational study was performed in collaboration with the seven obstetric  
16 teaching hospitals affiliated with the University of Melbourne: two city tertiary maternity, two outer urban  
17 general, and three regional and rural. The study protocol was approved through the centralised ethics  
18 approval process (Monash – Appendix) with individual hospital site specific approvals. The study was  
19 registered with the Australian Clinical Trial Registry prior to participant recruitment  
20 (ACTRN1261300060876; Universal Trial Number: U1111-1143-2500). The study was conducted in  
21 accordance with ICH GCP notes for Guidance on Good Clinical Practice (CPMP/ICH/135/95). The study  
22 was conducted during a fourteen month period from 23/11/2013 to 2/02/2015 during which time consecutive  
23 women were recruited at each of the seven hospitals over at least a three-month period.  
24  
25  
26  
27  
28  
29  
30  
31

32 Consecutive women undergoing caesarean section, elective and emergency, were eligible if they were 18  
33 years of age or older. Women were not eligible if: they were less than 18 years of age; undergoing planned  
34 combined surgery e.g. caesarean and tubal ligation; or the woman requested her data were excluded; or either  
35 parent requested the baby's data were excluded. Once eligible participants were identified and included in  
36 the study, at a clinically appropriate time (before, during, or after delivery) a doctor or trial coordinator  
37 sought verbal consent from eligible women using a standardised script approved by the Ethics Committee. A  
38 case report form (CRF) was developed to record maternal, neonatal, anaesthesia and surgical details, and  
39 maternal and neonatal outcomes. Data were recorded in the CRF and entered into the REDCap web-based  
40 data system (Vanderbilt University, USA) hosted at the University of Melbourne. Management of  
41 anaesthesia, surgery, and post-delivery care was at the discretion of the clinical team.  
42  
43  
44  
45  
46  
47  
48

### 49 *Maternal body mass index*

50 Maternal BMI at booking and delivery was calculated. Booking BMI was derived using the recorded weight  
51 at the first antenatal appointment, if available, while delivery BMI used the recorded weight and height at the  
52 time of the caesarean section. Delivery BMI was grouped into BMI categories of underweight, normal,  
53 overweight, obese and super-obese using standard WHO cut-off values (<18.5 kg/m<sup>2</sup> underweight, 18.5  
54 kg/m<sup>2</sup> to < 25 kg/m<sup>2</sup> normal, 25 kg/m<sup>2</sup> to < 30 kg/m<sup>2</sup> overweight, 30 kg/m<sup>2</sup> to < 40 kg/m<sup>2</sup> obese (class I and  
55  
56  
57  
58  
59  
60

1 II),  $\geq 40 \text{ kg/m}^2$  super-obese (class III) and also pregnancy specific cut-off values: WHO + 5  $\text{kg/m}^2$  ( $< 23.5$   
2  $\text{kg/m}^2$  underweight,  $23.5 \text{ kg/m}^2$  to  $< 30 \text{ kg/m}^2$  normal,  $30 \text{ kg/m}^2$  to  $< 35 \text{ kg/m}^2$  overweight,  $35 \text{ kg/m}^2$  to  $< 45$   
3  $\text{kg/m}^2$  obese,  $\geq 45 \text{ kg/m}^2$  super-obese ).  
4  
5  
6

#### 7 *Classification of urgency of caesarean section*

8  
9 Urgency of caesarean section was defined using Royal College of Obstetricians and Gynaecologists United  
10 Kingdom definitions.<sup>11</sup>  
11

#### 12 *Total theatre time, surgical time and anaesthesia time*

13  
14 Total theatre time (minutes) was defined using the Australian Federal Department of Health and Aging  
15 definition of total anaesthesia time: from when the anaesthetist commenced exclusive and continuous care of  
16 the patient for anaesthesia until when the anaesthetist was no longer in professional attendance, that is, when  
17 the participant was safely placed under the supervision of other personnel, usually recovery nursing staff.<sup>12</sup>  
18 Start time and finish time were recorded. Surgical time was defined as the time from the start of abdominal  
19 prepping until the time the final dressing was applied to the surgical wound. Anaesthesia time was defined as  
20 total theatre time – surgical time. This time was when only anaesthesia was being performed and not when  
21 anaesthesia and surgery were being undertaken together. The end of the operative day was defined as the  
22 next midnight following arrival in the post-anaesthesia care unit.  
23  
24  
25  
26  
27  
28  
29

#### 30 *Health economic data and cost analysis*

31  
32 Individual cost data of the study participants from the two largest recruiting centres were used for the  
33 economic analysis. Hospitalisation costs relevant to each participant's admission for caesarean delivery were  
34 extracted from participants' hospital records retrospectively. Costs obtained were based on each participant's  
35 hospital resource use, categorised into relevant specific subgroups for the entire length of their admission.  
36 Total hospital admission cost was the sum of three cost subgroups such that total hospital admission cost =  
37 Theatre cost + Surgical service cost + Inpatient cost. The three groups were defined as follows: Theatre costs  
38 were the total cost of the use of operating room, supplies and staff (both anaesthetist and surgical teams)  
39 necessary to perform the caesarean section, surgical service costs were the costs pertaining to the surgical  
40 supplies and staff (surgeon's time) only, and inpatient costs were composed of all other costs associated with  
41 the hospital admission such as nursing, medical imaging, pathology, allied and pharmacy.  
42  
43  
44  
45  
46  
47  
48

49 Cost subgroup specifications between the two hospitals were compared, and where necessary, re-grouped to  
50 ensure comparability. From the two hospitals, to quantify theatre costs and surgical service costs per minute,  
51 costs from the theatre and surgical service subgroups were divided by the total theatre times and surgical  
52 times respectively. Using these data, national costs were estimated to 2020.  
53  
54  
55

#### 56 *Statistical analysis*

1 Over a three-month period we expected that about 1,500 women would undergo caesarean section at the  
2 seven participating hospitals. We estimated that between a quarter (n=375) to a third (n=500) of those  
3 women would be obese at delivery with a pregnancy specific cut-off BMI  $\geq 35$  kg/m<sup>2</sup> and about 5% (n=75)  
4 to have a BMI  $\geq 45$  kg/m<sup>2</sup>. Therefore, this study would have approximately 80% power to detect a difference  
5 of 0.17 hours (~10 minutes) in the average theatre time between non-obese and obese participants, assuming  
6  $\alpha=0.05$ , and approximately 80% power to detect a difference of 0.33 hours (~20 minutes) between those  $\geq 45$   
7 kg/m<sup>2</sup> and those  $< 35$  kg/m<sup>2</sup>. These defined BMI classes were part of our secondary end analyses; our  
8 primary analysis was to treat BMI as a continuous variable. The nature of the continuous relationship  
9 between BMI and time was unclear so we did not perform a sample size calculation on the primary analysis.  
10  
11

12  
13  
14  
15  
16  
17 Linear regression was used to examine associations between continuous delivery BMI and total theatre time.  
18 To determine if maternal obesity was associated with increased total theatre time, we considered categories  
19 of BMI (underweight:  $< 23.5$  kg/m<sup>2</sup>, normal weight:  $23.5$  kg/m<sup>2</sup> to  $< 30$  kg/m<sup>2</sup>, overweight:  $30$  kg/m<sup>2</sup> to  $< 35$   
20 kg/m<sup>2</sup>, obese:  $35$  kg/m<sup>2</sup> to  $< 45$  kg/m<sup>2</sup>, super-obese:  $\geq 45$  kg/m<sup>2</sup>) as a predictor of total theatre time in linear  
21 regression models. We used these BMI classifications as underweight, normal weight, overweight, obese and  
22 super-obese rather than the usual non-pregnant cut-off points that are 5 kg/m<sup>2</sup> lower because our variable of  
23 interest was BMI at delivery. Both unadjusted analyses and analyses adjusted for potential confounders (age  
24 (years), delivery gestation (weeks), multiple pregnancy (no/yes), pre-eclampsia (no/yes), caesarean section  
25 urgency (category 1, category 2, category 3, category 4), previous caesarean section (no/yes), delivery  
26 hospital). Bonferroni-adjusted multiple comparisons were conducted to identify where there was evidence of  
27 a difference between BMI classifications. We conducted a complete case analysis, omitting participants who  
28 were missing data on the outcome or exposure variable, or any of the confounding variables. We conducted  
29 secondary analysis of surgery time and anaesthesia time using the same approach as described for the total  
30 theatre time. Unadjusted log-binomial regression models were fitted to determine whether there was an  
31 association between delivery BMI (BMI at delivery) and the risk of infant admission to a neonatal intensive  
32 care unit or special care nursery, or the risk of a maternal admission to intensive care unit, readmission to the  
33 operating room or red cell transfusion. In these analyses, only three categories of BMI (underweight and  
34 normal, overweight, obese and super-obese) were considered due to the small number of cases for some  
35 outcomes. For health economic data, all mean costs of hospital resource use were reported with SDs or 95%  
36 confidence intervals (CIs). Linear regression was performed to quantify the relationship between BMI and  
37 hospitalization cost. All statistical analysis was conducted using Stata version 13.0. This study is reported  
38 using the STROBE guidelines.<sup>13</sup>  
39  
40  
41  
42  
43  
44  
45  
46  
47  
48  
49  
50

## 51 **Results**

### 52 *Study participants*

53  
54 At the seven hospitals, during the data collection periods, there were a total of 1,978 caesarean section  
55 operations; a total of 1,505 (76%) women consented to participate. The primary endpoint of total theatre time  
56  
57  
58  
59  
60



1 was not recorded by the responsible anaesthetist in 48 participants and. we did not attempt to retrospectively  
2 determine the total theatre time. Therefore the final sample size was 1,457 participants. We were unable to  
3 obtain maternal delivery weights for 3% of those who consented to take part. The demographic and obstetric  
4 characteristics and clinical outcomes of the participants are shown in Table 1. Thirty eight percent of the  
5 caesarean sections were from the two categories of greatest urgency (Categories 1 and 2). General  
6 anaesthesia was the initial anaesthesia type in 39 women with similar proportions of women in each BMI  
7 category undergoing general anaesthesia (2.4%, 3.8%, 2.0%, 2.5% in normal, overweight, obese and super-  
8 obese categories respectively P=0.394)

#### 14 *Maternal body mass index*

15 The average BMI at delivery (Table 1, Figure 1) was 32 kg/m<sup>2</sup>, ranging from 16 to 66 kg/m<sup>2</sup> with 312 (21%)  
16 women weighing more than 100 kg. With the pregnancy specific cut-off points, normal BMI was defined as  
17 being 23.5 to < 30 kg/m<sup>2</sup>; this 5 kg/m<sup>2</sup> increase on the usual range is consistent with our finding of a mean  
18 BMI increase of 4.0 kg/m<sup>2</sup> from booking (mean 17 weeks gestation) to delivery. Using usual WHO BMI  
19 criteria, 88% of the participants would have been classified as overweight, obese or super-obese (Figure 1).  
20 Using the modified BMI criteria this fell to 55% of pregnant women being overweight, obese or super-obese,  
21 consistent with Australian population norms.<sup>14</sup> . For Category 1 caesarean sections, where there is an  
22 immediate risk to maternal or fetal life, 54 women (3.7% of total group) were classified as overweight,  
23 obese or super-obese according to pregnancy specific cut-off values (Table 2). The incidence of pre-  
24 eclampsia ranged from 3% in normal BMI to 14% in the super-obese.

#### 33 *Total theatre time*

34 The average total theatre time for caesarean section was 76 minutes (SD 19.3, range 34 to 165 minutes). We  
35 found a positive association between BMI at delivery and total theatre time: for every 1 kg/m<sup>2</sup> increase in  
36 BMI, total theatre time increased, on average, by 0.6 minutes (95% CI: 0.51, 0.77). Using pregnancy specific  
37 BMI categories, the mean total theatre time increased with increasing BMI category (Table 2 and Figure 2).  
38 Women classed as obese at delivery had a mean increase in total theatre time of 7.7 minutes (10%) compared  
39 to those classed as normal BMI, while women classed as super-obese at delivery had a total theatre time 19.8  
40 minutes (26%) longer than those who were of normal BMI (Table 3 and Figure 2). Both surgical and  
41 anaesthesia time increased in a linear fashion with BMI: for every 1 kg/m<sup>2</sup> increase in BMI, surgical time  
42 increased on average by 0.3 minutes (95% CI: 0.23, 0.44) and anaesthesia time by 0.3 minutes (95% CI:  
43 0.22, 0.39). However, considering the pregnancy BMI thresholds, there was a marked increase in the mean  
44 anaesthesia time between the obese and super-obese groups (mean increase of 8.4 minutes, 95% CI: 4.38,  
45 12.38) which was not the case for the mean surgery time (mean increase of 3.3 minutes, 95% CI: -1.66, 8.26)

#### 54 *Maternal and neonatal outcomes*

1 No mother or neonate died within five days of delivery. While numbers were small there was some evidence  
2 that greater BMI was associated with increased maternal admission to ICU (relative risk (RR) 1.07, 95% CI:  
3 1.00, 1.14;  $p = 0.045$ ). Of eleven women (0.7%) admitted to ICU after delivery (Table 2), six of the 11 were  
4 obese or super obese (54.5%) compared to one of the 11 in the normal weight or underweight group (9.1%)  
5 (overweight/obese versus normal/underweight RR 1.55, 95% CI: -0.04, 3.15;  $p = 0.057$ ). There was no  
6 evidence of an difference between receiving a red cell transfusion or return to the operating room between  
7 those who were classified as obese/super-obese and those who were normal or underweight (red cell  
8 transfusion: overweight/obese versus normal/underweight RR 1.57, 95% CI: 0.46, 5.39;  $p = 0.47$ ; return to  
9 operating room: overweight/obese versus normal/underweight RR 0.63, 95% CI: 0.12, 3.22;  $p = 0.58$ ).  
10 Furthermore, we did not find evidence of an association between delivery BMI and increased admission to  
11 neonatal intensive care (NICU). Overall sixty neonates (4.1%) were admitted to neonatal intensive care  
12 (NICU). Of these, 13 were the babies of obese or super obese women (21.7%) compared to 32 in the normal  
13 weight or underweight group (53.3%) (overweight/obese versus normal/underweight RR = 0.64, 95% CI:  
14 0.34, 1.20;  $p = 0.16$ ). Overall 227 neonates (15.6%) were admitted to special care. Of these, 79 were the  
15 babies of obese or super obese women (34.8%) compared to 82 in the normal or underweight BMI group  
16 (43.2%) (overweight/obese versus normal weight/underweight RR = 1.26, 95% CI: 0.96, 1.65;  $p = 0.09$ ).  
17  
18  
19  
20  
21  
22  
23  
24  
25  
26

### 27 *Economic outcomes*

28 We performed the economic analysis on 768 participants from one of the specialist obstetric hospitals (325)  
29 and one of the outer urban hospitals (443); 53% of the total study sample. With the exception of women who  
30 were underweight at delivery, women with above normal BMI incurred higher total hospital admission cost  
31 (Table 4). The mean total hospital admission cost for a woman of normal BMI was \$7,359 Australian Dollars  
32 (AUD) (SD, \$3,039) while women in the super-obese category had total costs of \$8,488 AUD (SD, \$3,564)  
33 (Table 4), which translates to a 15% increase in total hospital admission costs between a normal BMI and  
34 super obese women of \$1,129 (95% CI, \$95 to \$2,163). Approximately three-quarters of the total hospital  
35 admission cost was attributable to inpatient costs including nursing, medications and all other resources used  
36 during the patient's hospital stay while theatre costs accounted for a quarter of the total cost (Table 4). The  
37 approximate average theatre cost per minute for women undergoing caesarean section in general, regardless  
38 of BMI, was \$35/min.  
39  
40  
41  
42  
43  
44  
45  
46

47 Mean theatre cost increased progressively as BMI increased; there was evidence of a difference in cost  
48 between each of the higher BMI categories compared to women with normal BMI. Compared with normal  
49 BMI women, theatre costs were increased by 7% in the overweight, 11% in the obese, and 22% in super  
50 obese women. Women who were classified as super-obese incurred the greatest cost in all the other  
51 subgroups, except for imaging, when compared to women in other BMI categories with costs related to  
52 pathology services being 55% greater than normal BMI women. The mean length of hospital stay was the  
53 longest for a super-obese patient: 4.4 days (95% CI, 3.82-4.90), however the differences between each of the  
54  
55  
56  
57  
58  
59  
60

1  
2 BMI categories were small ( $p = 0.18$  for normal versus super obese; 95% CI of the mean difference: -0.96 to  
3 0.18) (Table 4).  
4

## 5 6 7 **Discussion**

8 We conducted a prospective multicentre study of the relationship between maternal BMI and outcomes for  
9 caesarean section. The major findings were that the pregnancy specific cut off values for BMI (WHO classes  
10 + 5 kg/m<sup>2</sup>) for pregnant women at delivery comprise a pragmatic BMI estimate for women undergoing  
11 caesarean sections. We found that increased BMI was associated with increased total theatre time, increased  
12 surgical time, increased anaesthesia time, increased risks of maternal admission to ICU, increased total  
13 hospital admission costs and increased theatre costs. Approximately 1 in 20 women were super-obese at  
14 delivery, and had more than 25% longer total theatre time, 20% longer surgical time, and 40% longer  
15 anaesthesia time, compared with normal weight women. Super-obese women also had a 15% increase in  
16 total hospital admission costs and a nearly 30% theatre costs compared with normal BMI women. These  
17 findings have important implications for understanding clinical care, operating theatre use, and health service  
18 costs, for both clinicians and health services managing pregnant women. These clinical and cost findings  
19 support arguments for increased allocated theatre time and increased funding for care of super-obese  
20 pregnant women.  
21  
22  
23  
24  
25  
26  
27

28  
29 Our study supports routinely recording height and weight measurements throughout pregnancy so that BMI  
30 can be used as part of care planning around the time of delivery with pregnancy specific BMI ranges  
31 5.0 kg/m<sup>2</sup> greater than current WHO ranges. While we found that the average BMI increase during  
32 pregnancy was 4.0 kg/m<sup>2</sup> it was most likely greater than 4.0 kg/m<sup>2</sup> due to the late average booking gestation  
33 of 17 weeks, leading to the pragmatic use of 5.0 kg/m<sup>2</sup> incremental changes in BMI classes.  
34  
35  
36  
37

38 We found that total hospital admission costs increased by 15% (about \$1,129 AUD per woman), including  
39 theatre costs by 22% (about \$500 AUD) in super-obese women compared with normal BMI women. These  
40 findings support the argument for increased funding of super-obese pregnant women. Based on our data, and  
41 using conservative estimates, additional hospital resources to manage super-obesity for Australian women  
42 undergoing caesarean section currently exceeds \$3.8 million annually and will continue to rise to over \$5  
43 million per year by 2020 with cumulative costs of over \$50 million over the next 10 years.  
44  
45  
46  
47  
48

49 A limitation is that we were not able to determine the underlying causes of the increased total theatre time,  
50 surgical time and anaesthesia time. The current association between anaesthesia difficulty and maternal  
51 obesity is unclear. Two recent studies could not clearly associate maternal obesity with anaesthetic  
52 difficulty.<sup>7,8</sup> In 2009, Bamgbade and colleagues conducted a single centre study of 1,477 women having  
53 caesarean section in the United Kingdom.<sup>7</sup> They found no evidence of an association between obesity and  
54 increased difficulty in spinal anaesthesia, increased block failure or increased use of general anaesthesia.  
55  
56  
57  
58  
59  
60

1 This study may have been limited by using a delivery obesity definition of  $\geq 30 \text{ kg/m}^2$  which was potentially  
2 over inclusive. These authors speculated that a BMI of  $35 \text{ kg/m}^2$  (that we used) may be better to define  
3 obesity at delivery. In another 2009 single centre study of 427 women, Ellinas and colleagues found  
4 evidence to demonstrate that obesity was associated with difficulty with neuraxial blockade for labour.<sup>8</sup> They  
5 did, however, find that obesity was associated with the two factors associated with difficult neuraxial block:  
6 inability to palpate landmarks and limited patient flexion. In a recent multicentre Australian study,  
7 McDonnell et al did not find that general anaesthesia for caesarean section was more likely for patients  
8 weighing more than 100 kg; they did not, however, consider BMI.<sup>15</sup> Similarly, in a single centre study  
9 Kinsella et al did not find evidence of an association between increased maternal weight and anaesthetic  
10 difficulty during caesarean section.<sup>16</sup>

11 An older single centre retrospective study of predominantly African American women from the United  
12 States found that maternal obesity, defined as BMI greater than  $30 \text{ kg/m}^2$ , was one of several factors  
13 associated with increased operative time for caesarean delivery.<sup>17</sup> They did not examine anaesthetic factors  
14 nor did they examine how total time varied with increasing body size. Because anaesthetists, and the rest of  
15 the delivery team, are caring for more women who are obese, there is growing expertise, and possibly  
16 efficiency, in managing obese pregnant women. Added to this growing experience and expertise are new  
17 technologies such as use of ultrasound to guide neuraxial blockade<sup>18,19</sup> and video-laryngoscopes to aid  
18 difficult intubation.<sup>20</sup> The combined effect of greater experience and new technologies may to some extent  
19 counteract challenges of maternal obesity.

20 While we were primarily looking at overweight and obesity, we noted that women who were underweight  
21 had higher average costs and theatre times than those classified as normal weight. Mungo and colleagues, in  
22 a study investigating outcomes of pulmonary resection for lung cancer, also found that underweight adults  
23 had a greater risk adjusted length of stage compared to normal weight patients.<sup>21</sup> Our findings may be  
24 explained by the presence of maternal comorbidities. Therefore, further research is required to confirm this  
25 unexpected finding.

## 26 Conclusions

27 Pregnancy specific BMI cut-off values are justified and enable correct classification of maternal size at  
28 delivery. Obesity is common among Australian women of child-bearing age and was found to be associated  
29 with increased total theatre time, surgical and anaesthesia time, increased maternal risk of ICU admission,  
30 increased total hospital admission costs and theatre costs. There was no evidence that mothers who were  
31 obese had increased risk of blood transfusion, re-admission to the operating room, neonatal admission to  
32 higher acuity care, or neonatal admission to special care nursery compared to those of normal weight.  
33 Clinicians and health administrators need to consider these clinical risks, the time implications and financial

1 costs when managing pregnant women. To do so we need to record maternal BMI during the antenatal  
2 period, increase communication between clinical teams and increase funding for women with increased BMI.  
3  
4

### 5 **Competing interests statement**

6 None  
7

### 8 **Financial disclosures**

9 None  
10

### 11 **Funding statement**

12 ANZCA Pilot Grant to develop case report form  
13  
14

### 15 **Acknowledgments**

16 We would like to thank the MUM SIZE investigators at the seven participating hospitals: **Ballarat Base**  
17 **Hospital:** Michael Shaw, Balvinder Kaur, Lucy Johnson, Gabriel Jones, Alyce Burgess; **The Mercy**  
18 **Hospital for Women:** Scott Simmons, Katrina Pirie, Anne Galati-Laguda, Leanne Pilkington; **The**  
19 **Northern Hospital:** Joseph Lew, Yasmin Lennie; **Goulburn Valley Health:** Arnold Beeton, Gwendolyn  
20 Liow; **Sunshine Hospital:** Elizabeth Hessian, Samantha Bates, Mari Kawamata, Miriam Towns, Anna  
21 Tippet, Jenny Vo; **North Eastern Hospital Wangaratta:** Andrew Haughton, Ben Kabbabe; **The Royal**  
22 **Women's Hospital:** Alicia Dennis, Sarah Grant, Jacqueline de Gabriel, Ingrid Walkley, Hannah Barker.  
23  
24  
25  
26  
27  
28  
29  
30  
31  
32

### 33 **Contributors statement**

34 AD: design; acquisition, analysis and interpretation of data; drafting and revising manuscript  
35  
36

37 KL: design; analysis and interpretation of data; drafting and revising manuscript  
38

39 DS: conception and design; acquisition, analysis, and interpretation of data; drafting and revising manuscript  
40

41 MT: design; acquisition, analysis and interpretation of data; drafting and revising manuscript  
42

43 KD: design; analysis and interpretation of data; revising manuscript  
44

45 PC: conception and design; interpretation of data; drafting and revising manuscript  
46

47 JL: conception and design; acquisition and interpretation of data; revising manuscript  
48

49 AP: design; acquisition and analysis of data; drafting and revising manuscript  
50

51 EH: acquisition, analysis, and interpretation of data; drafting and revising manuscript  
52

53 GT: conception and design; interpretation of data; revising manuscript  
54

55 SS: design; acquisition of data; revising manuscript  
56

57 DC: design; interpretation of data; drafting and revising manuscript  
58  
59  
60

**Table 1** Demographic and obstetric data

| Characteristics                                                                       | Mean (SD) and range / N (%) |
|---------------------------------------------------------------------------------------|-----------------------------|
| Age (years)                                                                           | 32.0 (5.2)<br>18.0 – 50.0   |
| Gestation at booking visit (weeks)                                                    | 17.0 (6.2)<br>1.0 – 39.0    |
| Weight at booking visit (kg)                                                          | 75.0 (20.2)<br>35.0 – 158.0 |
| Body mass index at booking visit (kg/m <sup>2</sup> )                                 | 28.0 (7.0)<br>15.8 – 62.3   |
| Gestation at delivery (weeks)                                                         | 38.0 (2.1)<br>25.0 – 42.0   |
| Body mass index at caesarean section (kg/m <sup>2</sup> )                             | 32.0 (6.9)<br>16.0 – 66.2   |
| Difference in body mass index between delivery and booking visit (kg/m <sup>2</sup> ) | 4.0 (2.7)<br>-3.6 – 16.9    |
| <b>Comorbidities</b>                                                                  |                             |
| Previous caesarean section                                                            | 638 (43.8%)                 |
| Multiple pregnancy                                                                    | 68 (4.7%)                   |
| Preeclampsia                                                                          | 62 (4.3%)                   |
| <b>Classification of urgency of caesarean section*</b>                                |                             |
| Category 1                                                                            | 116 (8.0%)                  |
| Category 2                                                                            | 433 (29.7%)                 |
| Category 3                                                                            | 261 (17.9%)                 |
| Category 4                                                                            | 647 (44.4%)                 |
| <b>Maternal and neonatal outcomes</b>                                                 |                             |
| Mother admitted to intensive care unit                                                | 11 (0.7%)                   |
| Mother received red cell transfusion                                                  | 20 (1.4%)                   |
| Mother returned to the operating room                                                 | 9 (0.6%)                    |
| Neonate admitted to neonatal intensive care unit                                      | 60 (4.1%)                   |
| Neonate admitted to special care unit                                                 | 227 (15.6%)                 |

\*RCOG classification \*\*age at delivery

<sup>a</sup>Sample from 1505 participants excluding those missing data on duration of anaesthesia (n=1; 0.1%), BMI (n=45; 3.0%) and potential confounders: age (n=1; 0.1%), gestation at delivery (no missing), multiple pregnancy (n=1; 0.1%), pre-eclampsia (no missing), C-section urgency (n=3; 0.2%) and previous C-section (no missing). N=1457

**Table 2** Descriptive characteristics of the participants by pregnancy proposed body mass index category

|                                      | Under-weight            | Normal weight           | Over-weight             | Obese                   | Super-obese             |
|--------------------------------------|-------------------------|-------------------------|-------------------------|-------------------------|-------------------------|
| Mean (SD) and range / N (%)          | n=79                    | n=570                   | n=395                   | n=337                   | n=76                    |
| Total theatre time (min)             | 69 (18.7)<br>34.0–120.0 | 72 (17.4)<br>36.0–156.0 | 77 (17.9)<br>35.0–150.0 | 80 (20.1)<br>40.0–165.0 | 92 (23.5)<br>49.0–157.0 |
| Surgical time (min)                  | 44 (13.2)<br>23.0–75.0  | 45 (13.9)<br>20.0–126.0 | 48 (14.4)<br>20.0–115.0 | 50 (14.8)<br>20.0–115.0 | 54 (15.1)<br>32.0–111.0 |
| Anaesthesia time (min)               | 26 (11.2)<br>9.0–50.0   | 27 (10.8)<br>5.0–104.0  | 28 (11.3)<br>0.0–84.0   | 29 (12.3)<br>3.0–113.0  | 38 (17.9)<br>0.0–107.0  |
| BMI at delivery (kg/m <sup>2</sup> ) | 22 (1.5)<br>16.1–23.4   | 27 (1.8)<br>23.5–30.0   | 32 (1.4)<br>30.0–34.9   | 39 (2.9)<br>35.0–45.0   | 50 (4.4)<br>45.1–66.2   |
| Age at delivery (years)              | 30 (4.7)<br>20.0–43.3   | 32 (5.1)<br>18.0–50.0   | 32 (5.0)<br>19.0–48.0   | 32 (5.5)<br>19.0–46.0   | 31 (5.5)<br>20.0–44.0   |
| Gestation at delivery (weeks)        | 38 (2.7)<br>25.0–41.0   | 39 (2.2)<br>25.0–42.0   | 39 (1.9)<br>26.0–42.0   | 39 (2.0)<br>27.0–42.0   | 38 (2.0)<br>31.0–40.0   |
| Multiple pregnancy                   | 4 (5.1%)                | 33 (5.8%)               | 18 (4.6%)               | 11 (3.3%)               | 2 (2.6%)                |
| Pre-eclampsia                        | 0 (0.0%)                | 16 (2.8%)               | 18 (4.6%)               | 17 (5.0%)               | 11 (14.5%)              |
| Caesarean section urgency*           |                         |                         |                         |                         |                         |
| Category 1                           | 4 (5.1%)                | 58 (10.2%)              | 27 (6.8%)               | 26 (7.7%)               | 1 (1.3%)                |
| Category 2                           | 27 (34.2%)              | 171 (30.0%)             | 116 (29.4%)             | 101 (30.0%)             | 18 (23.7%)              |
| Category 3                           | 16 (20.3%)              | 91 (16.0%)              | 73 (18.5%)              | 63 (18.7%)              | 18 (23.7%)              |
| Category 4                           | 32 (40.5%)              | 250 (43.9%)             | 179 (45.3%)             | 147 (43.6%)             | 39 (51.3%)              |
| Previous caesarean section           | 33 (41.8%)              | 226 (39.7%)             | 168 (42.5%)             | 174 (51.6%)             | 37 (48.7%)              |
| Mother admitted to ICU               | 0 (0.0%)                | 1 (0.2%)                | 4 (1.0%)                | 5 (1.5%)                | 1 (1.3%)                |
| Mother received transfusion          | 1 (5.0%)                | 4 (20.0%)               | 10 (50.0%)              | 5 (25.0%)               | 0 (0.0%)                |
| Mother returned to OR                | 1 (11.1%)               | 4 (44.4%)               | 2 (22.2%)               | 2 (22.2%)               | 0 (0.0%)                |
| NICU                                 | 4 (5.1%)                | 28 (4.9%)               | 15 (3.8%)               | 10 (3.0%)               | 3 (3.9%)                |
| Special Care                         | 16 (20.3%)              | 82 (14.4%)              | 50 (12.7%)              | 65 (19.3%)              | 14 (18.4%)              |

\* percentages are calculated from the the number of women in each caesarean section per total number of women in BMI category

**Table 3** Mean time differences by body mass index category compared with normal body mass index

| Paired comparison         | Difference mins (95% CI) * | p-values |
|---------------------------|----------------------------|----------|
| <b>Total theatre time</b> |                            |          |
| Normal – Underweight      | 2.7 (-3.6 to 9.0)          | 1.000    |
| Overweight – Normal       | 4.7 (1.3 to 8.2)           | 0.001    |
| Obese – Normal            | 7.7 (4.1 to 11.3)          | <0.001   |
| Super-obese – Normal      | 19.8 (13.4 to 26.2)        | <0.001   |
| <b>Surgical time</b>      |                            |          |
| Normal – Underweight      | 1.6 (-3.2 to 6.4)          | 1.000    |
| Overweight – Normal       | 2.9 (0.3 to 5.6)           | 0.017    |
| Obese – Normal            | 4.9 (2.2 to 7.7)           | <0.001   |
| Super-obese – Normal      | 8.7 (3.8 to 13.7)          | <0.001   |
| <b>Anaesthesia time</b>   |                            |          |
| Normal – Underweight      | 1.1 (-2.9 to 5.1)          | 1.000    |
| Overweight – Normal       | 1.8 (-0.38, 3.95)          | 0.207    |
| Obese – Normal            | 2.8 (0.5 to 5.1)           | 0.006    |
| Super-obese – Normal      | 11.1 (7.0 to 15.1)         | <0.001   |

\*Bonferroni adjusted



**Table 4** Mean costs and hospital length of stay, across body mass index categories.

|                                        | BMI categories |        |            |       |             |
|----------------------------------------|----------------|--------|------------|-------|-------------|
|                                        | Underweight    | Normal | Overweight | Obese | Super-Obese |
| N                                      | 52             | 320    | 192        | 165   | 39          |
| <b>Total hospital admission costs,</b> |                |        |            |       |             |
| mean (\$)                              | 7,605          | 7,359  | 7,442      | 7,530 | 8,487       |
| SD                                     | 3,589          | 3,039  | 2,543      | 2,680 | 3,564       |
| <b>Cost subgroups</b>                  |                |        |            |       |             |
| <i>Theatre, mean (\$)</i>              | 2,531          | 2,306  | 2,466      | 2,556 | 2,814       |
| SD                                     | 1,788          | 724    | 836        | 795   | 1,103       |
| <b>Length of hospital stay</b>         |                |        |            |       |             |
| Mean (days)                            | 3.8            | 4.0    | 4.0        | 3.9   | 4.4         |
| Min-max (days)                         | 1-11           | 1-15   | 1-20       | 1-14  | 3-9         |

Figure 1 Frequency of body mass index categories according to WHO and proposed pregnancy classifications

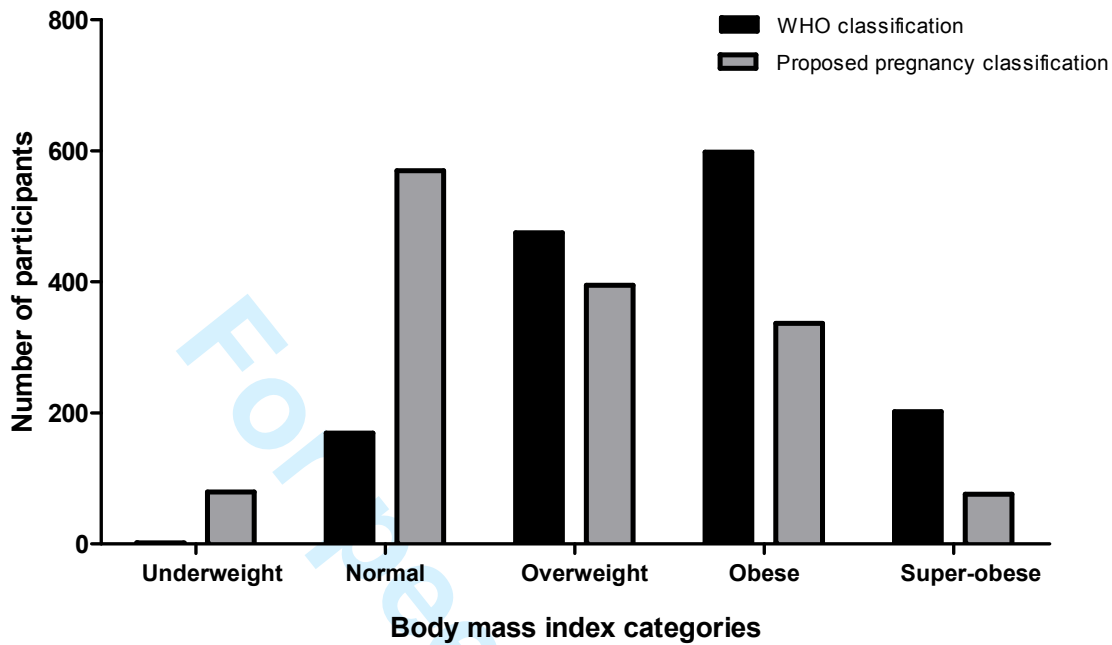

WHO cut-off points:  $<18.5 \text{ kg/m}^2$  underweight;  $18.5 \text{ to } < 25 \text{ kg/m}^2$  normal;  $25 \text{ to } < 30 \text{ kg/m}^2$  overweight;  $30 \text{ to } < 40 \text{ kg/m}^2$  obese;  $\geq 40 \text{ kg/m}^2$  super-obese.

Proposed pregnancy cut-off points:  $<23.5 \text{ kg/m}^2$  underweight;  $23.5 \text{ to } < 30 \text{ kg/m}^2$  normal;  $30 \text{ to } < 35 \text{ kg/m}^2$  overweight;  $35 \text{ to } < 45 \text{ kg/m}^2$  obese;  $\geq 45 \text{ kg/m}^2$  super-obese.

**Figure 2** Anaesthesia alone, surgical and total operating room times (mean and SD) by delivery BMI category.

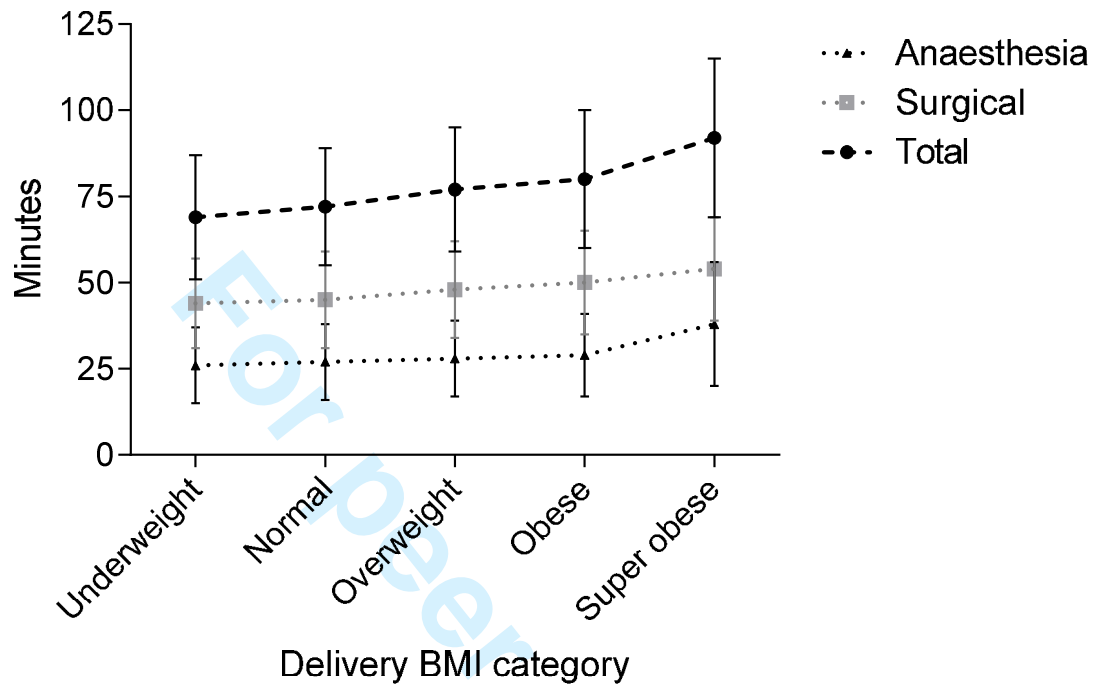

## References

1. World Health Organization Classification of Body Mass Index [http://apps.who.int/bmi/index.jsp?introPage=intro\\_3.html](http://apps.who.int/bmi/index.jsp?introPage=intro_3.html) Accessed 23rd August 2015.
2. Cantwell R, Clutton-Brock T, Cooper G, et al. Saving Mothers' Lives: Reviewing maternal deaths to make motherhood safer: 2006-2008. The Eighth Report of the Confidential Enquiries into Maternal Deaths in the United Kingdom. *British Journal of Obstetrics and Gynaecology* 2011;118 Suppl 1:1-203.
3. Brown MA, Hague WM, Higgins J, et al. The detection, investigation and management of hypertension in pregnancy: full consensus statement. *Aust N Z J Obstet Gynaecol* 2000;40:139-55.
4. Lewis G. The Confidential Enquiry into Maternal and Child Health(CEMACH). Saving Mothers' Lives:reviewing maternal deaths to make motherhood safer - 2003-2005. London: CEMACH; 2007.
5. Knight M, Kenyon S, Brocklehurst P, et al. Saving Lives, Improving Mothers' Care - Lessons learned to inform future maternity care from the UK and Ireland Confidential Enquiries into Maternal Deaths and Morbidity 2009–12. Oxford: National Perinatal Epidemiology Unit, University of Oxford. 2014.
6. Mace HS, Paech MJ, McDonnell NJ. Obesity and obstetric anaesthesia. *Anaesth Intensive Care* 2011;39:559-70.
7. Bamgbade OA, Khalaf WM, Ajai O, Sharma R, Chidambaram V, Madhavan G. Obstetric anaesthesia outcome in obese and non-obese parturients undergoing caesarean delivery: an observational study. *Int J Obstet Anesth* 2009;18:221-5.
8. Ellinas EH, Eastwood DC, Patel SN, Maitra-D'Cruze AM, Ebert TJ. The effect of obesity on neuraxial technique difficulty in pregnant patients: a prospective, observational study. *Anesthesia & Analgesia* 2009;109:1225-31.
9. Callaway LK, Prins JB, Chang AM, McIntyre HD. The prevalence and impact of overweight and obesity in an Australian obstetric population. *Med J Aust* 2006;184:56-9.
10. Butwick A, Carvalho B, Danial C, Riley E. Retrospective analysis of anesthetic interventions for obese patients undergoing elective cesarean delivery. *J Clin Anesth* 2010;22:519-26.
11. Tuffnell DJ SA, Waugh JJS, Walker JJ. The management of severe pre-eclampsia/eclampsia. In: Guideline No 10(A) Royal College of Obstetricians and Gynaecologists; 2006:11.

12. Relative Value Guide 18th Edition 2016 The Australian Society of Anaesthetists Limited North Sydney NSW 2059.
13. von Elm E, Altman DG, Egger M, Pocock SJ, Gotsche PC, Vandembroucke JP. Strengthening the Reporting of Observational Studies in Epidemiology (STROBE) statement: guidelines for reporting observational studies. *BMJ* 2007;335:806-8.
14. AIHW 2015. Cardiovascular disease, diabetes and chronic kidney disease—Australian facts: risk factors. Cardiovascular, diabetes and chronic kidney disease series no. 4. Cat. no. CDK 004. Canberra: AIHW.
15. McDonnell NJ, Muchatuta NA, Paech MJ. Management of a super-morbidly obese parturient requiring caesarean delivery (again!). *Anaesth Intensive Care* 2008;36:751.
16. Kinsella SM. A prospective audit of regional anaesthesia failure in 5080 Caesarean sections. *Anaesthesia* 2008;63:822-32.
17. Doherty DA, Magann EF, Chauhan SP, O'Boyle AL, Busch JM, Morrison JC. Factors affecting caesarean operative time and the effect of operative time on pregnancy outcomes. *Aust N Z J Obstet Gynaecol* 2008;48:286-91.
18. Carvalho JC. Ultrasound-facilitated epidurals and spinals in obstetrics. *Anesthesiol Clin* 2008;26:145-58, vii-viii.
19. Balki M, Lee Y, Halpern S, Carvalho JC. Ultrasound imaging of the lumbar spine in the transverse plane: the correlation between estimated and actual depth to the epidural space in obese parturients. *Anesthesia and analgesia* 2009;108:1876-81.
20. Cook TM, MacDougall-Davis SR. Complications and failure of airway management. *Br J Anaesth* 2012;109 Suppl 1:i68-i85.
21. Mungo B, Zogg CK, Hooker CM, et al. Does obesity affect the outcomes of pulmonary resections for lung cancer? A National Surgical Quality Improvement Program analysis. *Surgery* 2015;157:792-800.

1  
2  
3  
4  
5  
6  
7  
8  
9  
10  
11  
12  
13  
14  
15  
16  
17  
18  
19  
20  
21  
22  
23  
24  
25  
26  
27  
28  
29  
30  
31  
32  
33  
34  
35  
36  
37  
38  
39  
40  
41  
42  
43  
44  
45  
46  
47  
48  
49  
50  
51  
52  
53  
54  
55  
56  
57  
58  
59  
60

## STROBE Statement—checklist of items that should be included in reports of observational studies

| Included in MUMSIZE study | Item No | Recommendation                                                                                                                                                                                                                                                                                                                                                                                                                                                                                                                                                                                                                                                                                   |
|---------------------------|---------|--------------------------------------------------------------------------------------------------------------------------------------------------------------------------------------------------------------------------------------------------------------------------------------------------------------------------------------------------------------------------------------------------------------------------------------------------------------------------------------------------------------------------------------------------------------------------------------------------------------------------------------------------------------------------------------------------|
| ✓ page 1 - 3              | 1       | (a) Indicate the study's design with a commonly used term in the title or the abstract<br>(b) Provide in the abstract an informative and balanced summary of what was done and what was found                                                                                                                                                                                                                                                                                                                                                                                                                                                                                                    |
| <b>Introduction</b>       |         |                                                                                                                                                                                                                                                                                                                                                                                                                                                                                                                                                                                                                                                                                                  |
| ✓ page 4-5                | 2       | Explain the scientific background and rationale for the investigation being reported                                                                                                                                                                                                                                                                                                                                                                                                                                                                                                                                                                                                             |
| ✓ page 4-5                | 3       | State specific objectives, including any prespecified hypotheses                                                                                                                                                                                                                                                                                                                                                                                                                                                                                                                                                                                                                                 |
| <b>Methods</b>            |         |                                                                                                                                                                                                                                                                                                                                                                                                                                                                                                                                                                                                                                                                                                  |
| ✓ page 5-7                | 4       | Present key elements of study design early in the paper                                                                                                                                                                                                                                                                                                                                                                                                                                                                                                                                                                                                                                          |
| ✓ page 5-7                | 5       | Describe the setting, locations, and relevant dates, including periods of recruitment, exposure, follow-up, and data collection                                                                                                                                                                                                                                                                                                                                                                                                                                                                                                                                                                  |
| ✓ page 5-7                | 6       | (a) <i>Cohort study</i> —Give the eligibility criteria, and the sources and methods of selection of participants. Describe methods of follow-up<br><i>Case-control study</i> —Give the eligibility criteria, and the sources and methods of case ascertainment and control selection. Give the rationale for the choice of cases and controls<br><i>Cross-sectional study</i> —Give the eligibility criteria, and the sources and methods of selection of participants<br>(b) <i>Cohort study</i> —For matched studies, give matching criteria and number of exposed and unexposed<br><i>Case-control study</i> —For matched studies, give matching criteria and the number of controls per case |
| ✓ page 5-7                | 7       | Clearly define all outcomes, exposures, predictors, potential confounders, and effect modifiers. Give diagnostic criteria, if applicable                                                                                                                                                                                                                                                                                                                                                                                                                                                                                                                                                         |
| ✓ page 5-7                | 8*      | For each variable of interest, give sources of data and details of methods of assessment (measurement). Describe comparability of assessment methods if there is more than one group                                                                                                                                                                                                                                                                                                                                                                                                                                                                                                             |
| ✓ page 5-7                | 9       | Describe any efforts to address potential sources of bias                                                                                                                                                                                                                                                                                                                                                                                                                                                                                                                                                                                                                                        |
| ✓ page 5-7                | 10      | Explain how the study size was arrived at                                                                                                                                                                                                                                                                                                                                                                                                                                                                                                                                                                                                                                                        |
| ✓ page 5-7                | 11      | Explain how quantitative variables were handled in the analyses. If applicable, describe which groupings were chosen and why                                                                                                                                                                                                                                                                                                                                                                                                                                                                                                                                                                     |
| ✓ page 5-7                | 12      | (a) Describe all statistical methods, including those used to control for confounding<br>(b) Describe any methods used to examine subgroups and interactions<br>(c) Explain how missing data were addressed<br>(d) <i>Cohort study</i> —If applicable, explain how loss to follow-up was addressed                                                                                                                                                                                                                                                                                                                                                                                               |

*Case-control study*—If applicable, explain how matching of cases and controls was addressed

*Cross-sectional study*—If applicable, describe analytical methods taking account of sampling strategy

(e) Describe any sensitivity analyses

## Results

|                          |                  |     |                                                                                                                                                                                                                                                                                                                                                                                                               |
|--------------------------|------------------|-----|---------------------------------------------------------------------------------------------------------------------------------------------------------------------------------------------------------------------------------------------------------------------------------------------------------------------------------------------------------------------------------------------------------------|
| ✓ page 7-10              | Participants     | 13* | (a) Report numbers of individuals at each stage of study—eg numbers potentially eligible, examined for eligibility, confirmed eligible, included in the study, completing follow-up, and analysed<br>(b) Give reasons for non-participation at each stage<br>(c) Consider use of a flow diagram                                                                                                               |
| ✓ page 7-10              | Descriptive data | 14* | (a) Give characteristics of study participants (eg demographic, clinical, social) and information on exposures and potential confounders<br>(b) Indicate number of participants with missing data for each variable of interest<br>(c) <i>Cohort study</i> —Summarise follow-up time (eg, average and total amount)                                                                                           |
| ✓ page 7-10              | Outcome data     | 15* | <i>Cohort study</i> —Report numbers of outcome events or summary measures over time<br><i>Case-control study</i> —Report numbers in each exposure category, or summary measures of exposure<br><i>Cross-sectional study</i> —Report numbers of outcome events or summary measures                                                                                                                             |
| ✓ page 7-10              | Main results     | 16  | (a) Give unadjusted estimates and, if applicable, confounder-adjusted estimates and their precision (eg, 95% confidence interval). Make clear which confounders were adjusted for and why they were included<br>(b) Report category boundaries when continuous variables were categorized<br>(c) If relevant, consider translating estimates of relative risk into absolute risk for a meaningful time period |
| ✓ page 7-10              | Other analyses   | 17  | Report other analyses done—eg analyses of subgroups and interactions, and sensitivity analyses                                                                                                                                                                                                                                                                                                                |
| <b>Discussion</b>        |                  |     |                                                                                                                                                                                                                                                                                                                                                                                                               |
| ✓ page 10-11             | Key results      | 18  | Summarise key results with reference to study objectives                                                                                                                                                                                                                                                                                                                                                      |
| ✓ page 3,11              | Limitations      | 19  | Discuss limitations of the study, taking into account sources of potential bias or imprecision. Discuss both direction and magnitude of any potential bias                                                                                                                                                                                                                                                    |
| ✓ page 10-11             | Interpretation   | 20  | Give a cautious overall interpretation of results considering objectives, limitations, multiplicity of analyses, results from similar studies, and other relevant evidence                                                                                                                                                                                                                                    |
| ✓ page 10-11             | Generalisability | 21  | Discuss the generalisability (external validity) of the study results                                                                                                                                                                                                                                                                                                                                         |
| <b>Other information</b> |                  |     |                                                                                                                                                                                                                                                                                                                                                                                                               |
| ✓ page 12                | Funding          | 22  | Give the source of funding and the role of the funders for the present study and, if applicable, for the original study on which the present article is based                                                                                                                                                                                                                                                 |

\*Give information separately for cases and controls in case-control studies and, if applicable, for exposed and unexposed groups in cohort and cross-sectional studies.

1  
2  
3  
4  
5  
6  
7  
8  
9  
10  
11  
12  
13  
14  
15  
16  
17  
18  
19  
20  
21  
22  
23  
24  
25  
26  
27  
28  
29  
30  
31  
32  
33  
34  
35  
36  
37  
38  
39  
40  
41  
42  
43  
44  
45  
46  
47  
48  
49  
50  
51  
52  
53  
54  
55  
56  
57  
58  
59  
60

**Note:** An Explanation and Elaboration article discusses each checklist item and gives methodological background and published examples of transparent reporting. The STROBE checklist is best used in conjunction with this article (freely available on the Web sites of PLoS Medicine at <http://www.plosmedicine.org/>, Annals of Internal Medicine at <http://www.annals.org/>, and Epidemiology at <http://www.epidem.com/>). Information on the STROBE Initiative is available at [www.strobe-statement.org](http://www.strobe-statement.org).

For peer review only



# BMJ Open

## Associations between maternal size and health outcomes for women undergoing caesarean section: a multicentre prospective observational study (The MUM SIZE Study)

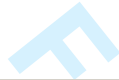

|                                 |                                                                                                                                                                                                                                                                                                                                                                                                                                                                                                                                                                                                                                                                                                                                                                                                                                                                                                                                                                                                      |
|---------------------------------|------------------------------------------------------------------------------------------------------------------------------------------------------------------------------------------------------------------------------------------------------------------------------------------------------------------------------------------------------------------------------------------------------------------------------------------------------------------------------------------------------------------------------------------------------------------------------------------------------------------------------------------------------------------------------------------------------------------------------------------------------------------------------------------------------------------------------------------------------------------------------------------------------------------------------------------------------------------------------------------------------|
| Journal:                        | <i>BMJ Open</i>                                                                                                                                                                                                                                                                                                                                                                                                                                                                                                                                                                                                                                                                                                                                                                                                                                                                                                                                                                                      |
| Manuscript ID                   | bmjopen-2016-015630.R1                                                                                                                                                                                                                                                                                                                                                                                                                                                                                                                                                                                                                                                                                                                                                                                                                                                                                                                                                                               |
| Article Type:                   | Research                                                                                                                                                                                                                                                                                                                                                                                                                                                                                                                                                                                                                                                                                                                                                                                                                                                                                                                                                                                             |
| Date Submitted by the Author:   | 31-Mar-2017                                                                                                                                                                                                                                                                                                                                                                                                                                                                                                                                                                                                                                                                                                                                                                                                                                                                                                                                                                                          |
| Complete List of Authors:       | Dennis, Alicia; The Royal Women's Hospital, Anaesthesia<br>Lamb, Karen; Deakin University, Institute for Physical Activity and Nutrition (IPAN)<br>Story, David; The University of Melbourne , Perioperative and Pain Medicine Unit, Melbourne Medical School<br>Tew, Michelle; The University of Melbourne , Health Economics Unit, Centre for Health Policy<br>Dalziel, Kim; The University of Melbourne, Health Economics Unit, Centre for Health Policy<br>Clarke, Philip; University of Melbourne, Health Economics Unit, Centre for Health Policy<br>Lew, Jospeh; The Northern Hosptial, Anaesthesia Department<br>Parker, Anna; The University of Melbourne , Perioperative and Pain Medicine Unit, Melbourne Medical School<br>Hessian, Elizabeth; Western Health , Anaesthesia and Pain Medicine<br>Teale, Gyn; Western Health , Women's and Children's Services Medicine<br>Simmons, Scott; Mercy Hospital for Women , Anaesthesia<br>Casalaz, Dan; Mercy Hospital for Women , Neonatology |
| <b>Primary Subject Heading</b>: | Obstetrics and gynaecology                                                                                                                                                                                                                                                                                                                                                                                                                                                                                                                                                                                                                                                                                                                                                                                                                                                                                                                                                                           |
| Secondary Subject Heading:      | Obstetrics and gynaecology, Anaesthesia                                                                                                                                                                                                                                                                                                                                                                                                                                                                                                                                                                                                                                                                                                                                                                                                                                                                                                                                                              |
| Keywords:                       | caesarean section, obesity, HEALTH ECONOMICS, Quality in health care < HEALTH SERVICES ADMINISTRATION & MANAGEMENT                                                                                                                                                                                                                                                                                                                                                                                                                                                                                                                                                                                                                                                                                                                                                                                                                                                                                   |
|                                 |                                                                                                                                                                                                                                                                                                                                                                                                                                                                                                                                                                                                                                                                                                                                                                                                                                                                                                                                                                                                      |

SCHOLARONE™  
Manuscripts

1  
2  
3  
4  
5  
6  
7  
8  
9  
10  
11  
12  
13  
14  
15  
16  
17  
18  
19  
20  
21  
22  
23  
24  
25  
26  
27  
28  
29  
30  
31  
32  
33  
34  
35  
36  
37  
38  
39  
40  
41  
42  
43  
44  
45  
46  
47  
48  
49  
50  
51  
52  
53  
54  
55  
56  
57  
58  
59  
60

1 **Associations between maternal size and health outcomes for women undergoing caesarean section: a**  
2 **multicentre prospective observational study (The MUM SIZE Study)\***

3  
4 Dennis A.T.<sup>1</sup>, Lamb K.E.<sup>2</sup>, Story D<sup>3</sup>, Tew, M<sup>4</sup>, Dalziel K<sup>5</sup>, Clarke P<sup>6</sup>, Lew J<sup>7</sup>, Parker A<sup>8</sup>, Hessian E<sup>9</sup>, Teale  
5 G<sup>10</sup>, Simmons S<sup>11</sup>, Casalaz D<sup>12</sup> on behalf of the MUM SIZE Investigators\*

6  
7 Address for each author and position

8 <sup>1</sup> MBBS, PhD, PGDipEcho, FANZCA, Associate Professor, Department of Obstetrics and Gynaecology and  
9 Department of Pharmacology, The University of Melbourne, Director of Anaesthesia Research, Staff  
10 Specialist Anaesthetist, Department of Anaesthesia, The Royal Women's Hospital, Locked Bag 300, Cnr  
11 Flemington Rd & Grattan St, Parkville, Victoria 3052, Australia

12 [alicia.dennis@thewomens.org.au](mailto:alicia.dennis@thewomens.org.au)

13  
14 <sup>2</sup> BSc (Hons) PhD, Biostatistician and Research Fellow, Institute for Physical Activity and Nutrition (IPAN),  
15 School of Exercise & Nutrition Science, Deakin University, Burwood, Australia [karen.lamb@deakin.edu.au](mailto:karen.lamb@deakin.edu.au)  
16 AND Department of Paediatrics, The University of Melbourne, Parkville, Australia

17  
18 <sup>3</sup> MBBS, MD, BMedSci, FANZCA, Chair of Anaesthesia and Head of Anaesthesia, Perioperative and Pain  
19 Medicine Unit, Melbourne Medical School, The University of Melbourne [dastory@unimelb.edu.au](mailto:dastory@unimelb.edu.au)

20  
21 <sup>4</sup> MPH MPharm, Research Assistant, Health Economics Unit, Centre for Health Policy, The University of  
22 Melbourne [michelle.tew@unimelb.edu.au](mailto:michelle.tew@unimelb.edu.au)

23  
24 <sup>5</sup> B.Health.Sc (hons), M.Health.Econ, PhD Research Fellow, Health Economics Unit, Centre for Health  
25 Policy, The University of Melbourne [kim.dalziel@unimelb.edu.au](mailto:kim.dalziel@unimelb.edu.au)

26  
27 <sup>6</sup> BEc, Mec, PhD, Chair of Health Economics, Health Economics Unit, Centre for Health Policy, The  
28 University of Melbourne [philip.clarke@unimelb.edu.au](mailto:philip.clarke@unimelb.edu.au)

29  
30 <sup>7</sup> MBBS, FANZCA Staff Anaesthetist, The Northern Hospital, Anaesthesia Department, Epping,  
31 Victoria, Australia [joseph.lew@nh.org.au](mailto:joseph.lew@nh.org.au)

32  
33 <sup>8</sup> MBBS, MPH, FANZCA, Deputy Director and Head of Anaesthesia Research, Western Health,  
34 Anaesthesia and Pain Medicine, Footscray, Victoria, Australia [Elizabeth.Hessian@mh.org.au](mailto:Elizabeth.Hessian@mh.org.au)

35  
36 <sup>9</sup> MA, MBioeth, BA, Manager, Anaesthesia Perioperative and Pain Medicine Unit, The University  
37 of Melbourne [anna.parker@unimelb.edu.au](mailto:anna.parker@unimelb.edu.au)

1  
2  
3 1  
4 2 <sup>10</sup>MRCP, MRCOG, MD, FRANZCOG, Specialist Obstetrician and Gynaecologist, Clinical  
5 3 Services Director, Women's and Children's Services, Sunshine Hospital, Western Health,  
6 4 [Glyn.Teale@wh.org.au](mailto:Glyn.Teale@wh.org.au)  
7  
8

9 5  
10 6 <sup>11</sup>BMBS, FANZCA, BSc, MBA, Director of Anaesthesia, Mercy Hospital for Women  
11 7 [SSimmons@mercy.com.au](mailto:SSimmons@mercy.com.au)  
12 8

13 9 <sup>12</sup>MBBS, MpubHlth, MRCPCH, FRACP, Specialist in Neonatology and Perinatology, Mercy Hospital for  
14 10 Women, Heidelberg, [DCasalaz@mercy.com.au](mailto:DCasalaz@mercy.com.au)  
15 11

16 12 \*See acknowledgements  
17 13

18 14 Author responsible for reprints: A/Prof Alicia Dennis Royal Women's Hospital, Locked Bag  
19 15 300, Corner Flemington Road and Grattan Street, Parkville Victoria 2052, Australia  
20 16 [alicia.dennis@thewomens.org.au](mailto:alicia.dennis@thewomens.org.au)  
21 17

22 18 Author responsible for correspondence: A/Prof Alicia Dennis Royal Women's Hospital, Locked Bag 300,  
23 19 Corner Flemington Road and Grattan Street, Parkville Victoria 3052, Australia  
24 20 Telephone: +61 3 8345 231  
25 21 Fax number: +61 3 8345 2379  
26 22 Mobile number: +61 407 685 054  
27 23 E: [alicia.dennis@thewomens.org.au](mailto:alicia.dennis@thewomens.org.au)  
28 24

29 25 **Short title:** Associations between maternal size and outcomes for caesarean section \*  
30 26  
31  
32  
33  
34  
35  
36  
37  
38  
39  
40  
41  
42  
43  
44  
45  
46  
47  
48  
49  
50  
51  
52  
53  
54  
55  
56  
57  
58  
59  
60

1  
2  
3  
4  
5  
6  
7  
8  
9  
10  
11  
12  
13  
14  
15  
16  
17  
18  
19  
20  
21  
22  
23  
24  
25  
26  
27  
28  
29  
30  
31  
32  
33  
34  
35  
36  
37  
38  
39  
40  
41  
42  
43  
44  
45  
46  
47  
48  
49  
50  
51  
52  
53  
54  
55  
56  
57  
58  
59  
60

## 1 Structured Abstract

2 **Objectives:** to investigate associations between maternal body mass index (BMI) at delivery (using  
3 pregnancy specific BMI cut-off values 5 kg/m<sup>2</sup> higher in each of the World Health Organization groups) and  
4 clinical, theatre utilization and health economic outcomes for women undergoing CS.

5 **Design:** A prospective multicentre observational study

6 **Setting:** Seven secondary or tertiary referral obstetric hospitals

7 **Participants:** 1,457 women undergoing all categories of CS.

8 **Data collection:** Height and weight were recorded at the initial antenatal visit and at delivery. We analysed  
9 the associations between delivery BMI (continuous and pregnancy specific cut-off values) and total theatre  
10 time, surgical time, anaesthesia time, maternal and neonatal adverse outcomes, total hospital admission, and  
11 theatre, costs.

12 **Results:** Mean participant characteristics were: age 32 years, gestation at delivery 38.4 weeks, and delivery  
13 BMI 32.2 kg/m<sup>2</sup>. Fifty-five percent of participants were overweight, obese or super-obese using delivery  
14 pregnancy specific BMI cut-off values. As BMI increased, total theatre time, surgical time and anaesthesia  
15 time increased. Super-obese participants had approximately 27% (17 minutes, p <0.001) longer total theatre  
16 time, 20% (9 minutes, p <0.001), longer surgical time and 40% (11 minutes, p <0.001) longer anaesthesia  
17 time when compared with normal BMI participants. Increased BMI at delivery was associated with increased  
18 risk of maternal intensive care unit admission (relative risk 1.07 p = 0.045) but no increased risk of neonatal  
19 admission to higher acuity care. Total hospital admission costs were 15% higher in super-obese women  
20 compared with normal BMI women and theatre costs were 27% higher in super-obese women.

21 **Conclusions:** Increased maternal BMI was associated with increased total theatre time, surgical and  
22 anaesthesia time, increased total hospital admission costs and theatre costs. Clinicians and health  
23 administrators should consider these clinical risks, time implications and financial costs when managing  
24 pregnant women.

## 26 Strengths and limitations of this study

- 27 • Large multicentre prospective study
- 28 • Broad representation of hospitals: two tertiary maternity, two urban general, three regional/rural
- 29 • First prospective study examining associations between BMI and clinical, time and economic outcomes
- 30 • All women undergoing caesarean section included
- 31 • We were not able to determine the cause of the increased time

## 1 Introduction

2 Obesity in women of child bearing age, in high income counties, is a major global health issue. The World  
3 Health Organization (WHO) uses the body mass index (BMI) to define categories of size in adults;  
4 underweight, normal, overweight, obese (subdivided in to class I, II) and super-obese (class III). BMI is  
5 defined a person's weight in kilograms divided by the square of their height in metres ( $\text{kg}/\text{m}^2$ ). WHO uses a  
6 BMI of  $\geq 25.0$  to  $29.9 \text{ kg}/\text{m}^2$  to define overweight, a BMI value of  $30.0$  to  $39.9 \text{ kg}/\text{m}^2$  to define obesity  
7 (class I and II) and a BMI value of  $\geq 40.0 \text{ kg}/\text{m}^2$  to define super-obesity (class III).<sup>1</sup> Using these BMI  
8 categories, the obesity rate in women of childbearing age has increased in high income countries from 16%  
9 in 1993 to 24% in 2007.<sup>2</sup>

10  
11 In pregnancy, an increased BMI is associated with adverse pregnancy outcomes including venous  
12 thromboembolism, pre-eclampsia, postpartum haemorrhage, and maternal death.<sup>2-6</sup> During pregnancy both  
13 pre-pregnancy BMI and BMI changes that occur as the result of gestational weight gain, contribute to the  
14 BMI at delivery. When considering BMI at delivery the use of non-pregnant BMI categories leads to over-  
15 representation of overweight or obese women in studies undermining analysis of the risks of obesity.<sup>7</sup> These  
16 limitations in using non-pregnant metrics at delivery has prompted groups to suggest that pregnancy specific  
17 BMI cut-off values be considered with a BMI of  $35 \text{ kg}/\text{m}^2$  or greater as a threshold for obesity at delivery  
18 rather than  $\geq 30 \text{ kg}/\text{m}^2$ .<sup>28,9</sup> Following on from defining delivery obesity (class I and II) as a BMI of  $\geq 35$   
19  $\text{kg}/\text{m}^2$ , a logical extension is to define delivery super-obesity (class III) as a BMI  $\geq 45 \text{ kg}/\text{m}^2$ .

20  
21 Regardless of problems in formally defining obesity at delivery, the rates of obesity in pregnancy are  
22 increasing, with not only the rate of pre-pregnancy obesity increasing, but also the rates of women gaining  
23 excessive gestational weight during pregnancy increasing.<sup>10</sup> Coupled with this are increasing caesarean  
24 section rates especially in women with increased BMI  $\geq 25.0 \text{ kg}/\text{m}^2$ .<sup>3,11</sup> When combined with increasing  
25 maternal size, the risks associated with caesarean section may be increased leading to adverse maternal and  
26 neonatal outcomes, increased total theatre times, and increased hospital costs. While there is considerable  
27 literature about obesity during pregnancy and post-delivery outcomes<sup>3</sup> there are fewer reports on the  
28 relationship between obesity and time it takes to perform a caesarean section and hospital costs in this  
29 setting. One small ( $n=100$ ) single centre retrospective study from the United States suggested that total  
30 theatre times were increased for women undergoing caesarean section with BMI  $\geq 40 \text{ kg}/\text{m}^2$  compared with  
31 women with a lower BMI.<sup>12</sup> While clinicians have greater experience in safely caring for obese and super-  
32 obese women, anecdotal reports indicate that increased duration of caesarean section for obese women  
33 adversely affects operating theatre suite planning and theatre utilization, and may have resource implications.  
34 There are, however, no quantitative data on these effects.

35  
36 The aim of this study was to investigate the association between maternal size at delivery using pregnancy  
37 specific BMI cut-off values and clinical (maternal and neonatal), theatre utilization and health economic

1 outcomes for women undergoing caesarean section. We aimed to determine if pregnancy specific BMI cut-  
2 off values of 35 kg/m<sup>2</sup> for obesity and 45 kg/m<sup>2</sup> for super-obesity are appropriate to assist planning around  
3 the time of delivery including resource allocation and theatre scheduling. Our primary hypothesis was that  
4 maternal obesity is associated with increased total theatre time. Our secondary hypotheses were that maternal  
5 obesity is associated with increased anaesthesia time, increased surgical time, increased length of hospital  
6 stay, increased use of intensive care services for women and neonatal services for babies, and increased  
7 hospital costs.

## 8 9 **Methods**

### 10 *Study participants*

11 A prospective multicentre observational study was performed in collaboration with the seven obstetric  
12 teaching hospitals affiliated with the University of Melbourne: two city tertiary maternity, two outer urban  
13 general, and three regional and rural. The study protocol was approved through the centralised ethics  
14 approval process (Monash – Appendix) with individual hospital site specific approvals. The study was  
15 registered with the Australian Clinical Trial Registry prior to participant recruitment  
16 (ACTRN1261300060876; Universal Trial Number: U1111-1143-2500). The study was conducted in  
17 accordance with ICH GCP notes for Guidance on Good Clinical Practice (CPMP/ICH/135/95). The study  
18 was conducted during a fourteen month period from 23/11/2013 to 2/02/2015 during which time consecutive  
19 women were recruited at each of the seven hospitals over at least a three-month period.

20  
21 Consecutive women undergoing caesarean section, elective and emergency, were eligible if they were 18  
22 years of age or older. Women were not eligible if: they were less than 18 years of age; undergoing planned  
23 combined surgery e.g. caesarean and tubal ligation; or the woman requested her data were excluded; or either  
24 parent requested the baby's data were excluded. Once eligible participants were identified and included in  
25 the study, at a clinically appropriate time (before, during, or after delivery) a doctor or trial coordinator  
26 sought verbal consent from eligible women using a standardised script approved by the Ethics Committee. A  
27 case report form (CRF) was developed to record maternal, neonatal, anaesthesia and surgical details, and  
28 maternal and neonatal outcomes. Data were recorded in the CRF and entered into the REDCap web-based  
29 data system (Vanderbilt University, USA) hosted at the University of Melbourne. Management of  
30 anaesthesia, surgery, and post-delivery care was at the discretion of the clinical team.

### 31 32 *Maternal body mass index*

33 Maternal BMI at booking and delivery was calculated. Booking BMI was derived using the recorded weight  
34 at the first antenatal appointment, if available, while delivery BMI used the recorded weight and height at the  
35 time of the caesarean section. Delivery BMI was grouped into BMI categories of underweight, normal,  
36 overweight, obese and super-obese using standard WHO cut-off values (<18.5 kg/m<sup>2</sup> underweight, 18.5  
37 kg/m<sup>2</sup> to < 25 kg/m<sup>2</sup> normal, 25 kg/m<sup>2</sup> to < 30 kg/m<sup>2</sup> overweight, 30 kg/m<sup>2</sup> to < 40 kg/m<sup>2</sup> obese (class I and

1 II),  $\geq 40 \text{ kg/m}^2$  super-obese (class III)) and also pregnancy specific cut-off values for women at delivery:  
2 WHO + 5  $\text{kg/m}^2$  ( $< 23.5 \text{ kg/m}^2$  underweight,  $23.5 \text{ kg/m}^2$  to  $< 30 \text{ kg/m}^2$  normal,  $30 \text{ kg/m}^2$  to  $< 35 \text{ kg/m}^2$   
3 overweight,  $35 \text{ kg/m}^2$  to  $< 45 \text{ kg/m}^2$  obese,  $\geq 45 \text{ kg/m}^2$  super-obese ).  
4

#### 5 *Classification of urgency of caesarean section*

6 Urgency of caesarean section was defined using Royal College of Obstetricians and Gynaecologists United  
7 Kingdom definitions.<sup>a13</sup>  
8

#### 9 *Total theatre time, surgical time and anaesthesia time*

10 Total theatre time (minutes) was defined using the Australian Federal Department of Health and Aging  
11 definition of total anaesthesia time: from when the anaesthetist commenced exclusive and continuous care of  
12 the patient for anaesthesia until when the anaesthetist was no longer in professional attendance, that is, when  
13 the participant was safely placed under the supervision of other personnel, usually recovery nursing staff.<sup>14</sup>  
14 Start time and finish time were recorded. Surgical time was defined as the time from the start of abdominal  
15 prepping until the time the final dressing was applied to the surgical wound. Anaesthesia time was defined as  
16 total theatre time – surgical time. This time was when only anaesthesia was being performed and not when  
17 anaesthesia and surgery were being undertaken together. The end of the operative day was defined as the  
18 next midnight following arrival in the post-anaesthesia care unit.  
19

#### 20 *Health economic data and cost analysis*

21 Individual cost data of the study participants from the two largest recruiting centres centers, a specialist  
22 center and an outer urban hospital, were used for the economic analysis and were representative of the type  
23 and locality of hospitals in Australia..<sup>15</sup> Hospitalisation costs relevant to each participant's admission for  
24 caesarean delivery were extracted from participants' hospital records retrospectively. Costs, in Australian  
25 dollars (AUD), obtained were based on each participant's hospital resource use, categorised into relevant  
26 specific subgroups for the entire length of their admission. Total hospital admission cost was the sum of  
27 three cost subgroups such that total hospital admission cost = Theatre cost + Surgical service cost + Inpatient  
28 cost. The three groups were defined as follows: Theatre costs were the total cost of the use of operating  
29 room, supplies and staff (both anaesthetist and surgical teams) necessary to perform the caesarean section,  
30 surgical service costs were the costs pertaining to the surgical supplies and staff (surgeon's time) only, and  
31 inpatient costs were composed of all other costs associated with the hospital admission such as nursing,  
32 medical imaging, pathology, allied and pharmacy.  
33

---

34  
35  
36  
37  
38  
39  
40  
41  
42  
43  
44  
45  
46  
47  
48  
49  
50  
51  
52  
53  
54  
55  
56  
57  
58  
59  
60  
<sup>a</sup> Category 1 = maternal or fetal compromise - immediate threat to life of woman or fetus; Category 2 = maternal or fetal compromise - no immediate threat to life of woman or fetus; Category 3 = no maternal or fetal compromise – requires early delivery; Category 4 = no maternal or fetal compromise – delivery at a time to suit woman and maternity services

1 Cost subgroup specifications between the two hospitals were compared, and where necessary, re-grouped to  
2 ensure comparability. From the two hospitals, to quantify theatre costs and surgical service costs per minute,  
3 costs from the theatre and surgical service subgroups were divided by the total theatre times and surgical  
4 times respectively. National costs were estimated to 2020 assuming linear progression based on historical  
5 data on number of pregnancies and proportions of caesarean sections and obesity among pregnant women.  
6 Costs were discounted at a standard rate of 5% adjusting future costs to reflect present value.<sup>16,17</sup>

### 8 *Statistical analysis*

9 Over a three-month period we expected that about 1,500 women would undergo caesarean section at the  
10 seven participating hospitals. We estimated that between a quarter (n=375) to a third (n=500) of those  
11 women would be obese at delivery with a pregnancy specific cut-off BMI  $\geq 35$  kg/m<sup>2</sup> and about 5% (n=75)  
12 to have a BMI  $\geq 45$  kg/m<sup>2</sup>. Therefore, this study would have approximately 80% power to detect a difference  
13 of 0.17 hours (~10 minutes) in the average theatre time between non-obese and obese participants, assuming  
14  $\alpha=0.05$ , and approximately 80% power to detect a difference of 0.33 hours (~20 minutes) between those  $\geq 45$   
15 kg/m<sup>2</sup> and those  $< 35$  kg/m<sup>2</sup>. These defined BMI classes were part of our secondary end analyses; our  
16 primary analysis was to treat BMI as a continuous variable. The nature of the continuous relationship  
17 between BMI and time was unclear so we did not perform a sample size calculation on the primary analysis.

18  
19 Linear regression was used to examine associations between continuous delivery BMI and total theatre time.  
20 To determine if maternal obesity was associated with increased total theatre time, we considered categories  
21 of BMI (underweight:  $< 23.5$  kg/m<sup>2</sup>, normal weight:  $23.5$  kg/m<sup>2</sup> to  $< 30$  kg/m<sup>2</sup>, overweight:  $30$  kg/m<sup>2</sup> to  $< 35$   
22 kg/m<sup>2</sup>, obese:  $35$  kg/m<sup>2</sup> to  $< 45$  kg/m<sup>2</sup>, super-obese:  $\geq 45$  kg/m<sup>2</sup>) as a predictor of total theatre time in linear  
23 regression models. To assess the assumptions that the residuals are normally distributed with zero mean and  
24 constant variance, normality plots and plots of residuals against fitted values will be examined. All models  
25 include adjustment for hospital. We used these BMI classifications as underweight, normal weight,  
26 overweight, obese and super-obese rather than the usual non-pregnant cut-off points that are 5 kg/m<sup>2</sup> lower  
27 because our variable of interest was BMI at delivery. Both unadjusted analyses and analyses adjusted for  
28 potential confounders (age (years), delivery gestation (weeks), multiple pregnancy (no/yes), pre-eclampsia  
29 (no/yes), caesarean section urgency (category 1, category 2, category 3, category 4), previous caesarean  
30 section (no/yes), delivery hospital). Bonferroni-adjusted multiple comparisons were conducted to identify  
31 where there was evidence of a difference between BMI classifications. We conducted a complete case  
32 analysis, omitting participants who were missing data on the outcome or exposure variable, or any of the  
33 confounding variables. We conducted secondary analysis of surgery time and anaesthesia time using the  
34 same approach as described for the total theatre time. Unadjusted log-binomial regression models were fitted  
35 to determine whether there was an association between delivery BMI (BMI at delivery) and the risk of infant  
36 admission to a neonatal intensive care unit or special care nursery, or the risk of a maternal admission to  
37 intensive care unit, readmission to the operating room or red cell transfusion. In these analyses, only three



1 categories of BMI (underweight and normal, overweight, obese and super-obese) were considered due to the  
2 small number of cases for some outcomes. For health economic data, all mean costs of hospital resource use  
3 were reported with SDs or 95% confidence intervals (CIs). T-test was used to test for mean differences for  
4 each BMI categories against the normal group and their p-values reported. Linear regression was performed  
5 to quantify the relationship between BMI and hospitalization cost. All statistical analysis was conducted  
6 using Stata version 13.0. This study is reported using the STROBE guidelines.<sup>18</sup>

## 8 **Results**

### 9 *Study participants*

10 At the seven hospitals, during the data collection periods, there were a total of 1,978 caesarean section  
11 operations; a total of 1,505 (76%) women consented to participate. The primary endpoint of total theatre time  
12 was not recorded by the responsible anaesthetist in 48 participants and. we did not attempt to retrospectively  
13 determine the total theatre time. Therefore the final sample size was 1,457 participants. We were unable to  
14 obtain maternal delivery weights for 3% of those who consented to take part. The demographic and obstetric  
15 characteristics and clinical outcomes of the participants are shown in Table 1. Thirty eight percent of the  
16 caesarean sections were from the two categories of greatest urgency (Categories 1 and 2). General  
17 anaesthesia was the initial anaesthesia type in 39 women with similar proportions of women in each BMI  
18 category undergoing general anaesthesia (2.4%, 3.8%, 2.0%, 2.5% in normal, overweight, obese and super-  
19 obese categories respectively P=0.394)

### 21 *Maternal body mass index*

22 The average BMI at delivery (Table 1, Figure 1) was 32 kg/m<sup>2</sup>, ranging from 17 to 66 kg/m<sup>2</sup> with 312 (21%)  
23 women weighing more than 100 kg. With the pregnancy specific cut-off points for women at delivery ,  
24 normal BMI was defined as being 23.5 to < 30 kg/m<sup>2</sup>; this 5 kg/m<sup>2</sup> increase on the usual range is consistent  
25 with our finding of a mean BMI increase of 4.0 kg/m<sup>2</sup> from booking (mean 17 weeks gestation) to delivery.  
26 Using usual WHO BMI criteria, 88% of the participants would have been classified as overweight, obese or  
27 super-obese (Figure 1). Using the modified BMI criteria this fell to 55% of pregnant women being  
28 overweight, obese or super-obese, consistent with Australian population norms.<sup>19</sup> . For Category 1 caesarean  
29 sections, where there is an immediate risk to maternal or fetal life, 54 women (3.7% of total group) were  
30 classified as overweight, obese or super-obese according to pregnancy specific cut-off values for women at  
31 delivery (Table 2). The incidence of pre-eclampsia ranged from 3% in normal BMI to 14% in the super-  
32 obese.

### 34 *Total theatre time*

35 The average total theatre time for caesarean section was 76 minutes (SD 19.3, range 34 to 165 minutes). We  
36 found a positive association between BMI at delivery and total theatre time: for every 1 kg/m<sup>2</sup> increase in  
37 BMI, total theatre time increased, on average, by 0.6 minutes (95% CI: 0.51, 0.77). Using pregnancy specific

1 BMI categories for women at delivery, the mean total theatre time increased with increasing BMI category  
2 (Table 2 and Figure 2). Women classed as obese at delivery had a mean increase in total theatre time of 7.7  
3 minutes (10%) compared to those classed as normal BMI, while women classed as super-obese at delivery  
4 had a total theatre time 19.8 minutes (26%) longer than those who were of normal BMI (Table 3 and Figure  
5 2). Both surgical and anaesthesia time increased in a linear fashion with BMI: for every 1 kg/m<sup>2</sup> increase in  
6 BMI, surgical time increased on average by 0.3 minutes (95% CI: 0.23, 0.44) and anaesthesia time by 0.3  
7 minutes (95% CI: 0.22, 0.39). However, considering the pregnancy BMI thresholds, there was a marked  
8 increase in the mean anaesthesia time between the obese and super-obese groups (mean increase of 8.4  
9 minutes, 95% CI: 4.38, 12.38) which was not the case for the mean surgery time (mean increase of 3.3  
10 minutes, 95% CI: -1.66, 8.26)

### 11 12 *Maternal and neonatal outcomes*

13 No mother or neonate died within five days of delivery. While numbers were small there was some evidence  
14 that greater BMI was associated with increased maternal admission to ICU (relative risk (RR) 1.07, 95% CI:  
15 1.00, 1.14;  $p = 0.045$ ). Of eleven women (0.7%) admitted to ICU after delivery (Table 2), six of the 11 were  
16 obese or super obese (54.5%) compared to one of the 11 in the normal weight or underweight group (9.1%)  
17 (overweight/obese versus normal/underweight RR 1.55, 95% CI: -0.04, 3.15;  $p = 0.057$ ). There was no  
18 evidence of an difference between receiving a red cell transfusion or return to the operating room between  
19 those who were classified as obese/super-obese and those who were normal or underweight (red cell  
20 transfusion: overweight/obese versus normal/underweight RR 1.57, 95% CI: 0.46, 5.39;  $p = 0.47$ ; return to  
21 operating room: overweight/obese versus normal/underweight RR 0.63, 95% CI: 0.12, 3.22;  $p = 0.58$ ).  
22 Furthermore, we did not find evidence of an association between delivery BMI and increased admission to  
23 neonatal intensive care (NICU). Overall sixty neonates (4.1%) were admitted to neonatal intensive care  
24 (NICU). Of these, 13 were the babies of obese or super obese women (21.7%) compared to 32 in the normal  
25 weight or underweight group (53.3%) (overweight/obese versus normal/underweight RR = 0.64, 95% CI:  
26 0.34, 1.20;  $p = 0.16$ ). Overall 227 neonates (15.6%) were admitted to special care. Of these, 79 were the  
27 babies of obese or super obese women (34.8%) compared to 82 in the normal or underweight BMI group  
28 (43.2%) (overweight/obese versus normal weight/underweight RR = 1.26, 95% CI: 0.96, 1.65;  $p = 0.09$ ).

### 29 30 *Economic outcomes*

31 We performed the economic analysis on 768 participants from one of the specialist obstetric hospitals (325)  
32 and one of the outer urban hospitals (443); 53% of the total study sample. With the exception of women who  
33 were underweight at delivery, women with above normal BMI incurred higher total hospital admission cost  
34 (Table 4). The mean total hospital admission cost for a woman of normal BMI was \$7,359 Australian Dollars  
35 (AUD) (SD, \$3,039) while women in the super-obese category had total costs of \$8,488 AUD (SD, \$3,564)  
36 (Table 4), which translates to a 15% increase in total hospital admission costs between a normal BMI and  
37 super obese women of \$1,129 (95% CI, \$95 to \$2,163). Approximately three-quarters of the total hospital

1 admission cost was attributable to inpatient costs including nursing, medications and all other resources used  
2 during the patient's hospital stay while theatre costs accounted for a quarter of the total cost (Table 4). The  
3 approximate average theatre cost per minute for women undergoing caesarean section in general, regardless  
4 of BMI, was \$35/min.

5  
6 Mean theatre cost increased progressively as BMI increased; there was evidence of a difference in cost  
7 between each of the higher BMI categories compared to women with normal BMI. Compared with normal  
8 BMI women, theatre costs were increased by 7% in the overweight, 11% in the obese, and 22% in super  
9 obese women. Women who were classified as super-obese incurred the greatest cost in all the other  
10 subgroups, except for imaging, when compared to women in other BMI categories with costs related to  
11 pathology services being 55% greater than normal BMI women. The mean length of hospital stay was the  
12 longest for a super-obese patient: 4.4 days (95% CI, 3.82-4.90), however the differences between each of the  
13 BMI categories were small ( $p = 0.18$  for normal versus super obese; 95% CI of the mean difference: -0.96 to  
14 0.18) (Table 4).

## 15 16 **Discussion**

17 We conducted a prospective multicentre study of the relationship between maternal BMI and outcomes for  
18 caesarean section. The major findings were that increased BMI was associated with increased total theatre  
19 time, increased surgical time, increased anaesthesia time, increased risks of maternal admission to ICU,  
20 increased total hospital admission costs and increased theatre costs. Using our predetermined pregnancy  
21 specific cut off values for BMI (WHO classes + 5 kg/m<sup>2</sup>) for women at the time of delivery we found that  
22 approximately 1 in 20 women were super-obese at delivery, and had more than 25% longer total theatre time,  
23 20% longer surgical time, and 40% longer anaesthesia time, compared with normal weight women. Super-  
24 obese women also had a 15% increase in total hospital admission costs and a nearly 30% theatre costs  
25 compared with normal BMI women. These findings have important implications for understanding clinical  
26 care, operating theatre use, and health service costs, for both clinicians and health services managing  
27 pregnant women. These clinical and cost findings support arguments for increased allocated theatre time and  
28 increased funding for care of super-obese pregnant women.

29  
30 Whilst the recording of pre-pregnancy BMI and gestational weight gain are important, our study supports  
31 routinely recording height and weight measurements throughout pregnancy so that BMI can be used  
32 as part of care planning around the time of delivery with pregnancy specific BMI ranges 5.0 kg/m<sup>2</sup> greater  
33 than current WHO ranges. While we found that the average BMI increase during pregnancy was 4.0 kg/m<sup>2</sup> it  
34 was most likely greater than 4.0 kg/m<sup>2</sup> due to the late average booking gestation of 17 weeks, leading to the  
35 pragmatic use of 5.0 kg/m<sup>2</sup> incremental changes in BMI classes.

1 We found that total hospital admission costs increased by 15% (about \$1,129 AUD per woman), including  
2 theatre costs by 22% (about \$500 AUD) in super-obese women compared with normal BMI women. These  
3 findings support the argument for increased funding of super-obese pregnant women. Based on our data, and  
4 using conservative estimates, additional hospital resources to manage super-obesity for Australian women  
5 undergoing caesarean section currently exceeds \$3.8 million annually and will continue to rise to over \$5  
6 million per year by 2020 with cumulative costs of over \$50 million over the next 10 years.

7  
8 A limitation is that we were not able to determine the underlying causes of the increased total theatre time,  
9 surgical time and anaesthesia time. The current association between anaesthesia difficulty and maternal  
10 obesity is unclear. Two recent studies could not clearly associate maternal obesity with anaesthetic  
11 difficulty.<sup>8,9</sup> In 2009, Bamgbade and colleagues conducted a single centre study of 1,477 women having  
12 caesarean section in the United Kingdom.<sup>8</sup> They found no evidence of an association between obesity and  
13 increased difficulty in spinal anaesthesia, increased block failure or increased use of general anaesthesia.  
14 This study may have been limited by using a delivery obesity definition of  $\geq 30 \text{ kg/m}^2$  which was potentially  
15 over inclusive. These authors speculated that a BMI of  $35 \text{ kg/m}^2$  (that we used) may be better to define  
16 obesity at delivery. In another 2009 single centre study of 427 women, Ellinas and colleagues found  
17 evidence to demonstrate that obesity was associated with difficulty with neuraxial blockade for labour.<sup>9</sup> They  
18 did, however, find that obesity was associated with the two factors associated with difficult neuraxial block:  
19 inability to palpate landmarks and limited patient flexion. In a recent multicentre Australian study,  
20 McDonnell et al did not find that general anaesthesia for caesarean section was more likely for patients  
21 weighing more than 100 kg; they did not, however, consider BMI.<sup>20</sup> Similarly, in a single centre study  
22 Kinsella et al did not find evidence of an association between increased maternal weight and anaesthetic  
23 difficulty during caesarean section.<sup>21</sup>

24  
25 It is also important to note that some anaesthesia times were recorded as zero minutes. This occurred when  
26 surgical prepping and anaesthesia commenced at the same time. Additionally according to our definition of  
27 anaesthesia time, in some cases this may not reflect the total time to establish anaesthesia if there is a delay  
28 between surgical prepping and incision time due to establishment of anaesthesia.

29  
30 An older single centre retrospective study of predominantly African American women from the United  
31 States found that maternal obesity, defined as BMI greater than  $30 \text{ kg/m}^2$ , was one of several factors  
32 associated with increased operative time for caesarean delivery.<sup>22</sup> They did not examine anaesthetic factors  
33 nor did they examine how total time varied with increasing body size. Because anaesthetists, and the rest of  
34 the delivery team, are caring for more women who are obese, there is growing expertise, and possibly  
35 efficiency, in managing obese pregnant women. Added to this growing experience and expertise are new  
36 technologies such as use of ultrasound to guide neuraxial blockade<sup>23,24</sup> and video-laryngoscopes to aid

1 difficult intubation.<sup>25</sup> The combined effect of greater experience and new technologies may to some extent  
2 counteract challenges of maternal obesity.  
3

4 While we were primarily looking at overweight and obesity, we noted that women who were underweight  
5 had higher average costs and theatre times than those classified as normal weight. Mungo and colleagues, in  
6 a study investigating outcomes of pulmonary resection for lung cancer, also found that underweight adults  
7 had a greater risk adjusted length of stage compared to normal weight patients.<sup>26</sup> Our findings may be  
8 explained by the presence of maternal comorbidities. Therefore, further research is required to confirm this  
9 unexpected finding.  
10

### 11 **Conclusions**

12 Pregnancy specific BMI cut-off values for women at delivery are justified and enable correct classification of  
13 maternal size at delivery. Obesity is common among Australian women of child-bearing age and was found  
14 to be associated with increased total theatre time, surgical and anaesthesia time, increased maternal risk of  
15 ICU admission, increased total hospital admission costs and theatre costs. There was no evidence that  
16 mothers who were obese had increased risk of blood transfusion, re-admission to the operating room,  
17 neonatal admission to higher acuity care, or neonatal admission to special care nursery compared to those of  
18 normal weight. Clinicians and health administrators need to consider these clinical risks, the time  
19 implications and financial costs when managing pregnant women. To do so we need to record maternal BMI  
20 during the antenatal period and at delivery, increase communication between clinical teams and increase  
21 funding for women with increased BMI.  
22

### 23 **Competing interests statement**

24 None  
25

### 26 **Financial disclosures**

27 None  
28

### 28 **Funding statement**

29 ANZCA Pilot Grant to develop case report form  
30

### 31 **Contributors statement**

32 AD: design; acquisition, analysis and interpretation of data; drafting and revising manuscript

33 KL: design; analysis and interpretation of data; drafting and revising manuscript

34 DS: conception and design; acquisition, analysis, and interpretation of data; drafting and revising manuscript

35 MT: design; acquisition, analysis and interpretation of data; drafting and revising manuscript

36 KD: design; analysis and interpretation of data; revising manuscript

37 PC: conception and design; interpretation of data; drafting and revising manuscript  
38  
39  
40  
41  
42  
43  
44  
45  
46  
47  
48  
49  
50  
51  
52  
53  
54  
55  
56  
57  
58  
59  
60

1 JL: conception and design; acquisition and interpretation of data; revising manuscript  
2 AP: design; acquisition and analysis of data; drafting and revising manuscript  
3 EH: acquisition, analysis, and interpretation of data; drafting and revising manuscript  
4 GT: conception and design; interpretation of data; revising manuscript  
5 SS: design; acquisition of data; revising manuscript  
6 DC: design; interpretation of data; drafting and revising manuscript  
7

## 8 **Acknowledgments**

9 We would like to thank the MUM SIZE investigators at the seven participating hospitals: **Ballarat Base**

10 **Hospital:** Michael Shaw, Balvinder Kaur, Lucy Johnson, Gabriel Jones, Alyce Burgess; **The Mercy**

11 **Hospital for Women:** Scott Simmons, Katrina Pirie, Anne Galati-Laguda, Leanne Pilkington; **The**

12 **Northern Hospital:** Joseph Lew, Yasmin Lennie; **Goulburn Valley Health:** Arnold Beeton, Gwendolyn

13 Liow; **Sunshine Hospital:** Elizabeth Hessian, Samantha Bates, Mari Kawamata, Miriam Towns, Anna

14 Tippet, Jenny Vo; **North Eastern Hospital Wangaratta:** Andrew Haughton, Ben Kabbabe; **The Royal**

15 **Women's Hospital:** Alicia Dennis, Sarah Grant, Jacqueline de Gabriel, Ingrid Walkley, Hannah Barker.

16 This work was presented in part at the Australian and New Zealand College of Anaesthetists (ANZCA)

17 Annual Scientific Meeting in Auckland New Zealand, May 2016 as a poster in the Obstetric Anaesthesia

18 2016 congress May 19-20, 2016, Manchester Central Convention Complex

19 UK) <http://www.epostersonline.com/oa2016/node/46>

20 and the Society of Obstetric Anesthesiologists and Perinatologists (SOAP) Meeting in Boston in May 2016

## 22 **Data sharing statement**

23 There are no additional unpublished data from the study.

1 **Table 1** Demographic and obstetric data

| Characteristics                                                                       | Mean (SD) and range / N (%) |
|---------------------------------------------------------------------------------------|-----------------------------|
| Age (years)                                                                           | 32.0 (5.2)<br>18.0 – 50.0   |
| Gestation at booking visit (weeks)                                                    | 17.0 (6.2)<br>1.0 – 39.0    |
| Weight at booking visit (kg)                                                          | 75.0 (20.2)<br>35.0 – 158.0 |
| Body mass index at booking visit (kg/m <sup>2</sup> )                                 | 28.0 (7.0)<br>15.8 – 62.3   |
| Gestation at delivery (weeks)                                                         | 38.0 (2.1)<br>25.0 – 42.0   |
| Body mass index at caesarean section (kg/m <sup>2</sup> )                             | 32.0 (6.9)<br>17.0 – 66.2   |
| Difference in body mass index between delivery and booking visit (kg/m <sup>2</sup> ) | 4.0 (2.7)<br>-3.6 – 16.9    |
| <b>Comorbidities</b>                                                                  |                             |
| Previous caesarean section                                                            | 638 (43.8%)                 |
| Multiple pregnancy                                                                    | 68 (4.7%)                   |
| Preeclampsia                                                                          | 62 (4.3%)                   |
| <b>Classification of urgency of caesarean section*</b>                                |                             |
| Category 1                                                                            | 116 (8.0%)                  |
| Category 2                                                                            | 433 (29.7%)                 |
| Category 3                                                                            | 261 (17.9%)                 |
| Category 4                                                                            | 647 (44.4%)                 |
| <b>Maternal and neonatal outcomes</b>                                                 |                             |
| Mother admitted to intensive care unit                                                | 11 (0.7%)                   |
| Mother received red cell transfusion                                                  | 20 (1.4%)                   |
| Mother returned to the operating room                                                 | 9 (0.6%)                    |
| Neonate admitted to neonatal intensive care unit                                      | 60 (4.1%)                   |
| Neonate admitted to special care unit                                                 | 227 (15.6%)                 |

2  
3 \*RCOG classification \*\*age at delivery

4 <sup>a</sup>Sample from 1505 participants excluding those missing data on duration of anaesthesia (n=1; 0.1%), BMI (n=45;  
5 3.0%) and potential confounders: age (n=1; 0.1%), gestation at delivery (no missing), multiple pregnancy (n=1; 0.1%),  
6 pre-eclampsia (no missing), C-section urgency (n=3; 0.2%) and previous C-section (no missing). N=1457

1 **Table 2** Descriptive characteristics of the participants by pregnancy proposed body mass index category

|                                      | Under-weight            | Normal weight           | Over-weight             | Obese                   | Super-obese             |
|--------------------------------------|-------------------------|-------------------------|-------------------------|-------------------------|-------------------------|
| Mean (SD) and range / N (%)          | n=79                    | n=570                   | n=395                   | n=337                   | n=76                    |
| Total theatre time (min)             | 69 (18.7)<br>34.0–120.0 | 72 (17.4)<br>36.0–156.0 | 77 (17.9)<br>35.0–150.0 | 80 (20.1)<br>40.0–165.0 | 92 (23.5)<br>49.0–157.0 |
| Surgical time (min)                  | 44 (13.2)<br>23.0–75.0  | 45 (13.9)<br>20.0–126.0 | 48 (14.4)<br>20.0–115.0 | 50 (14.8)<br>20.0–115.0 | 54 (15.1)<br>32.0–111.0 |
| Anaesthesia time (min)               | 26 (11.2)<br>9.0–50.0   | 27 (10.8)<br>5.0–104.0  | 28 (11.3)<br>0.0–84.0   | 29 (12.3)<br>3.0–113.0  | 38 (17.9)<br>0.0–107.0  |
| BMI at delivery (kg/m <sup>2</sup> ) | 22 (1.5)<br>17.0–23.4   | 27 (1.8)<br>23.5–30.0   | 32 (1.4)<br>30.0–34.9   | 39 (2.9)<br>35.0–45.0   | 50 (4.4)<br>45.1–66.2   |
| Age at delivery (years)              | 30 (4.7)<br>20.0–43.3   | 32 (5.1)<br>18.0–50.0   | 32 (5.0)<br>19.0–48.0   | 32 (5.5)<br>19.0–46.0   | 31 (5.5)<br>20.0–44.0   |
| Gestation at delivery (weeks)        | 38 (2.7)<br>25.0–41.0   | 39 (2.2)<br>25.0–42.0   | 39 (1.9)<br>26.0–42.0   | 39 (2.0)<br>27.0–42.0   | 38 (2.0)<br>31.0–40.0   |
| Multiple pregnancy                   | 4 (5.1%)                | 33 (5.8%)               | 18 (4.6%)               | 11 (3.3%)               | 2 (2.6%)                |
| Pre-eclampsia                        | 0 (0.0%)                | 16 (2.8%)               | 18 (4.6%)               | 17 (5.0%)               | 11 (14.5%)              |
| Caesarean section urgency*           |                         |                         |                         |                         |                         |
| Category 1                           | 4 (5.1%)                | 58 (10.2%)              | 27 (6.8%)               | 26 (7.7%)               | 1 (1.3%)                |
| Category 2                           | 27 (34.2%)              | 171 (30.0%)             | 116 (29.4%)             | 101 (30.0%)             | 18 (23.7%)              |
| Category 3                           | 16 (20.3%)              | 91 (16.0%)              | 73 (18.5%)              | 63 (18.7%)              | 18 (23.7%)              |
| Category 4                           | 32 (40.5%)              | 250 (43.9%)             | 179 (45.3%)             | 147 (43.6%)             | 39 (51.3%)              |
| Previous caesarean section           | 33 (41.8%)              | 226 (39.7%)             | 168 (42.5%)             | 174 (51.6%)             | 37 (48.7%)              |
| Mother admitted to ICU               | 0 (0.0%)                | 1 (0.2%)                | 4 (1.0%)                | 5 (1.5%)                | 1 (1.3%)                |
| Mother received transfusion          | 1 (5.0%)                | 4 (20.0%)               | 10 (50.0%)              | 5 (25.0%)               | 0 (0.0%)                |
| Mother returned to OR                | 1 (11.1%)               | 4 (44.4%)               | 2 (22.2%)               | 2 (22.2%)               | 0 (0.0%)                |
| NICU                                 | 4 (5.1%)                | 28 (4.9%)               | 15 (3.8%)               | 10 (3.0%)               | 3 (3.9%)                |
| Special Care                         | 16 (20.3%)              | 82 (14.4%)              | 50 (12.7%)              | 65 (19.3%)              | 14 (18.4%)              |

2 \* percentages are calculated from the the number of women in each caesarean section per total number of women in

3 BMI category



1 **Table 3** Mean time differences by body mass index category compared with normal body mass index

2

| Paired comparison    | Difference mins (95% CI) * | p-values |
|----------------------|----------------------------|----------|
| Total theatre time   |                            |          |
| Normal – Underweight | 2.7 (-3.6 to 9.0)          | 1.000    |
| Overweight – Normal  | 4.7 (1.3 to 8.2)           | 0.001    |
| Obese – Normal       | 7.7 (4.1 to 11.3)          | <0.001   |
| Super-obese – Normal | 19.8 (13.4 to 26.2)        | <0.001   |
| Surgical time        |                            |          |
| Normal – Underweight | 1.6 (-3.2 to 6.4)          | 1.000    |
| Overweight – Normal  | 2.9 (0.3 to 5.6)           | 0.017    |
| Obese – Normal       | 4.9 (2.2 to 7.7)           | <0.001   |
| Super-obese – Normal | 8.7 (3.8 to 13.7)          | <0.001   |
| Anaesthesia time     |                            |          |
| Normal – Underweight | 1.1 (-2.9 to 5.1)          | 1.000    |
| Overweight – Normal  | 1.8 (-0.38, 3.95)          | 0.207    |
| Obese – Normal       | 2.8 (0.5 to 5.1)           | 0.006    |
| Super-obese – Normal | 11.1 (7.0 to 15.1)         | <0.001   |

3 \*Bonferroni adjusted

1 **Table 4** Mean costs and hospital length of stay, across body mass index categories.

|                                        | <b>BMI categories</b> |               |                   |              |                    |
|----------------------------------------|-----------------------|---------------|-------------------|--------------|--------------------|
|                                        | <b>Underweight</b>    | <b>Normal</b> | <b>Overweight</b> | <b>Obese</b> | <b>Super-Obese</b> |
| N                                      | 52                    | 320           | 192               | 165          | 39                 |
| <b>Total hospital admission costs,</b> |                       |               |                   |              |                    |
| mean (\$)                              | 7,605                 | 7,359         | 7,442             | 7,530        | 8,487              |
| SD                                     | 3,589                 | 3,039         | 2,543             | 2,680        | 3,564              |
| <b>Cost subgroups</b>                  |                       |               |                   |              |                    |
| <i>Theatre, mean (\$)</i>              | 2,531                 | 2,306         | 2,466             | 2,556        | 2,814              |
| SD                                     | 1,788                 | 724           | 836               | 795          | 1,103              |
| <b>Length of hospital stay</b>         |                       |               |                   |              |                    |
| Mean (days)                            | 3.8                   | 4.0           | 4.0               | 3.9          | 4.4                |
| Min-max (days)                         | 1-11                  | 1-15          | 1-20              | 1-14         | 3-9                |

1 **Figure 1** Frequency of body mass index categories according to WHO and proposed pregnancy classifications

2

3

4 WHO cut-off points: <18.5 kg/m<sup>2</sup> underweight; 18.5 to < 25 kg/m<sup>2</sup> normal; 25 to < 30 kg/m<sup>2</sup> overweight; 30 to < 40  
5 kg/m<sup>2</sup> obese; ≥ 40 kg/m<sup>2</sup> super-obese.

6 Proposed pregnancy cut-off points: <23.5 kg/m<sup>2</sup> underweight; 23.5 to < 30 kg/m<sup>2</sup> normal; 30 to < 35 kg/m<sup>2</sup> overweight;  
7 35 to < 45 kg/m<sup>2</sup> obese; ≥ 45 kg/m<sup>2</sup> super-obese.

8

9

For peer review only

1  
2  
3  
4  
5  
6  
7  
8  
9  
10  
11  
12  
13  
14  
15  
16  
17  
18  
19  
20  
21  
22  
23  
24  
25  
26  
27  
28  
29  
30  
31  
32  
33  
34  
35  
36  
37  
38  
39  
40  
41  
42  
43  
44  
45  
46  
47  
48  
49  
50  
51  
52  
53  
54  
55  
56  
57  
58  
59  
60

1 **Figure 2** Anaesthesia alone, surgical and total operating room times (mean and SD) by delivery  
2 BMI category.  
3

For peer review only

1  
2  
3  
4  
5  
6  
7  
8  
9  
10  
11  
12  
13  
14  
15  
16  
17  
18  
19  
20  
21  
22  
23  
24  
25  
26  
27  
28  
29  
30  
31  
32  
33  
34  
35  
36  
37  
38  
39  
40  
41  
42  
43  
44  
45  
46  
47  
48  
49  
50  
51  
52  
53  
54  
55  
56  
57  
58  
59  
60  
**References**

1. World Health Organization Classification of Body Mass Index [http://apps.who.int/bmi/index.jsp?introPage=intro\\_3.html](http://apps.who.int/bmi/index.jsp?introPage=intro_3.html) Accessed 23rd August 2015.
2. Cantwell R, Clutton-Brock T, Cooper G, et al. Saving Mothers' Lives: Reviewing maternal deaths to make motherhood safer: 2006-2008. The Eighth Report of the Confidential Enquiries into Maternal Deaths in the United Kingdom. *British Journal of Obstetrics and Gynaecology* 2011;118 Suppl 1:1-203.
3. Brown MA, Hague WM, Higgins J, et al. The detection, investigation and management of hypertension in pregnancy: full consensus statement. *Aust N Z J Obstet Gynaecol* 2000;40:139-55.
4. Lewis G. The Confidential Enquiry into Maternal and Child Health(CEMACH). Saving Mothers' Lives:reviewing maternal deaths to make motherhood safer - 2003-2005. London: CEMACH; 2007.
5. Knight M, Kenyon S, Brocklehurst P, et al. Saving Lives, Improving Mothers' Care - Lessons learned to inform future maternity care from the UK and Ireland Confidential Enquiries into Maternal Deaths and Morbidity 2009–12. Oxford: National Perinatal Epidemiology Unit, University of Oxford. 2014.
6. Cedergren M. Effects of gestational weight gain and body mass index on obstetric outcome in Sweden. *International Journal of Gynecology & Obstetrics* 2006;93(3):269–74.
7. Mace HS, Paech MJ, McDonnell NJ. Obesity and obstetric anaesthesia. *Anaesth Intensive Care* 2011;39:559-70.
8. Bamgbade OA, Khalaf WM, Ajai O, Sharma R, Chidambaram V, Madhavan G. Obstetric anaesthesia outcome in obese and non-obese parturients undergoing caesarean delivery: an observational study. *Int J Obstet Anesth* 2009;18:221-5.
9. Ellinas EH, Eastwood DC, Patel SN, Maitra-D'Cruze AM, Ebert TJ. The effect of obesity on neuraxial technique difficulty in pregnant patients: a prospective, observational study. *Anesthesia & Analgesia* 2009;109:1225-31.
10. Helms E, Coulson CC, Galvin SL. Trends in weight gain during pregnancy: a population study across 16 years in North Carolina. *American Journal of Obstetrics and Gynecology* 2006;194(5):e32–e34.
11. Callaway LK, Prins JB, Chang AM, McIntyre HD. The prevalence and impact of overweight and obesity in an Australian obstetric population. *Med J Aust* 2006;184:56-9.
12. Butwick A, Carvalho B, Danial C, Riley E. Retrospective analysis of anesthetic interventions for obese patients undergoing elective cesarean delivery. *J Clin Anesth* 2010;22:519-26.
13. Tuffnell DJ SA, Waugh JJS, Walker JJ. The management of severe pre-eclampsia/eclampsia. In: Guideline No 10(A) Royal College of Obstetricians and Gynaecologists; 2006:11.
14. Relative Value Guide 18th Edition 2016 The Australian Society of Anaesthetists Limited North Sydney NSW 2059.
15. AIHW 2015. Australia's mothers and babies 2013—in brief. Perinatal statistics series no. 31. Cat. no. PER 72. Canberra: AIHW. <http://www.aihw.gov.au/WorkArea/DownloadAsset.aspx?id=60129554140> Viewed 15/3/2017.
16. McIntyre HD, Gibbons KS, Flenady VJ, CallawayLK. 2012, Overweight and obesity in Australian mothers: epidemic or endemic? *The Medical Journal Of Australia* 2012; 196 (3):184-188.
17. Australian Institute of Health and Welfare. Australia's Mothers and Babies 2012. <http://www.aihw.gov.au/WorkArea/DownloadAsset.aspx?id=60129550054>. Accessed 23 September 2015.

- 1 18. von Elm E, Altman DG, Egger M, Pocock SJ, Gotsche PC, Vandenbroucke JP.  
2 Strengthening the Reporting of Observational Studies in Epidemiology (STROBE) statement:  
3 guidelines for reporting observational studies. *BMJ* 2007;335:806-8.
- 4 19. AIHW 2015. Cardiovascular disease, diabetes and chronic kidney disease—Australian facts:  
5 risk factors. Cardiovascular, diabetes and chronic kidney disease series no. 4. Cat. no. CDK 004.  
6 Canberra: AIHW.
- 7 20. McDonnell NJ, Muchatuta NA, Paech MJ. Management of a super-morbidly obese  
8 parturient requiring caesarean delivery (again!). *Anaesth Intensive Care* 2008;36:751.
- 9 21. Kinsella SM. A prospective audit of regional anaesthesia failure in 5080 Caesarean sections.  
10 *Anaesthesia* 2008;63:822-32.
- 11 22. Doherty DA, Magann EF, Chauhan SP, O'Boyle AL, Busch JM, Morrison JC. Factors  
12 affecting caesarean operative time and the effect of operative time on pregnancy outcomes. *Aust N*  
13 *Z J Obstet Gynaecol* 2008;48:286-91.
- 14 23. Carvalho JC. Ultrasound-facilitated epidurals and spinals in obstetrics. *Anesthesiol Clin*  
15 2008;26:145-58, vii-viii.
- 16 24. Balki M, Lee Y, Halpern S, Carvalho JC. Ultrasound imaging of the lumbar spine in the  
17 transverse plane: the correlation between estimated and actual depth to the epidural space in obese  
18 parturients. *Anesthesia and analgesia* 2009;108:1876-81.
- 19 25. Cook TM, MacDougall-Davis SR. Complications and failure of airway management. *Br J*  
20 *Anaesth* 2012;109 Suppl 1:i68-i85.
- 21 26. Mungo B, Zogg CK, Hooker CM, et al. Does obesity affect the outcomes of pulmonary  
22 resections for lung cancer? A National Surgical Quality Improvement Program analysis. *Surgery*  
23 2015;157:792-800.

1  
2  
3  
4  
5  
6  
7  
8  
9  
10  
11  
12  
13  
14  
15  
16  
17  
18  
19  
20  
21  
22  
23  
24  
25  
26  
27  
28  
29  
30  
31  
32  
33  
34  
35  
36  
37  
38  
39  
40  
41  
42  
43  
44  
45  
46  
47  
48  
49  
50  
51  
52  
53  
54  
55  
56  
57  
58  
59  
60

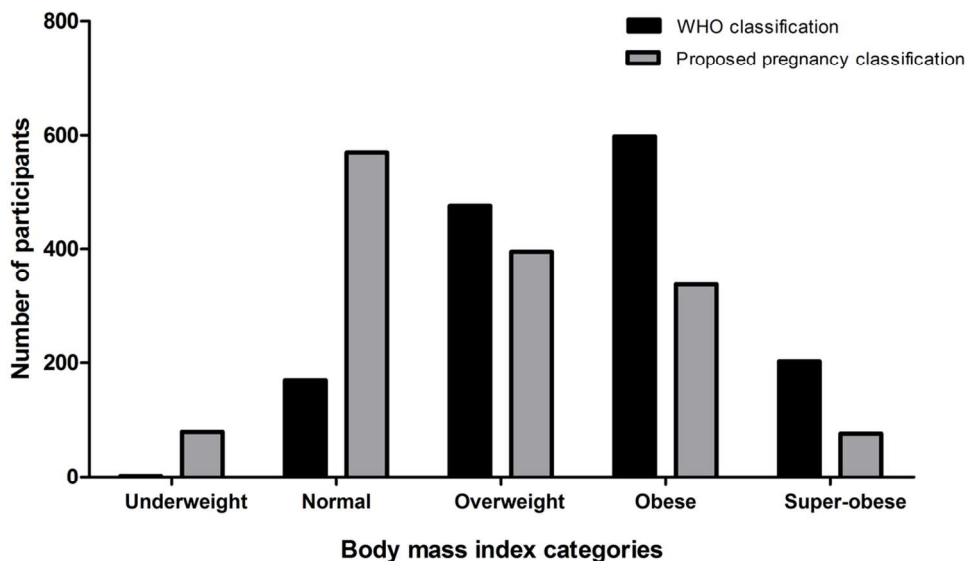

Caption: Figure 1 Frequency of body mass index categories according to WHO and proposed pregnancy classifications

Legend: WHO cut-off points: <18.5 kg/m<sup>2</sup> underweight; 18.5 to < 25 kg/m<sup>2</sup> normal; 25 to < 30 kg/m<sup>2</sup> overweight; 30 to < 40 kg/m<sup>2</sup> obese; ≥ 40 kg/m<sup>2</sup> super-obese.

Proposed pregnancy cut-off points: <23.5 kg/m<sup>2</sup> underweight; 23.5 to < 30 kg/m<sup>2</sup> normal; 30 to < 35 kg/m<sup>2</sup> overweight; 35 to < 45 kg/m<sup>2</sup> obese; ≥ 45 kg/m<sup>2</sup> super-obese.

108x67mm (300 x 300 DPI)

For peer review only

1  
2  
3  
4  
5  
6  
7  
8  
9  
10  
11  
12  
13  
14  
15  
16  
17  
18  
19  
20  
21  
22  
23  
24  
25  
26  
27  
28  
29  
30  
31  
32  
33  
34  
35  
36  
37  
38  
39  
40  
41  
42  
43  
44  
45  
46  
47  
48  
49  
50  
51  
52  
53  
54  
55  
56  
57  
58  
59  
60

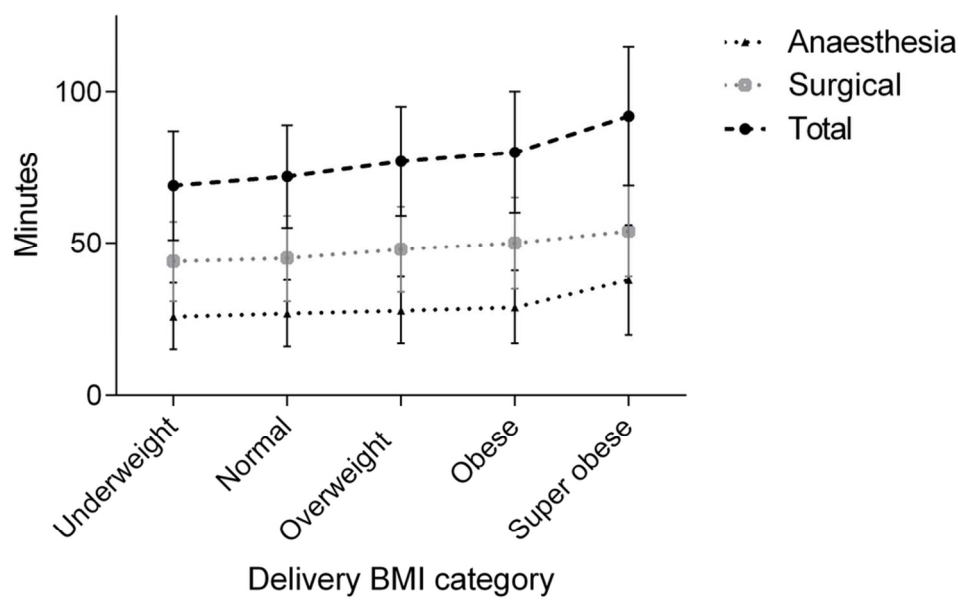

Caption: Figure 2 Anaesthesia alone, surgical and total operating room times (mean and SD) by delivery BMI category.

88x58mm (300 x 300 DPI)

View only



## STROBE Statement—checklist of items that should be included in reports of observational studies

| Included in MUMSIZE study |                          | Item No | Recommendation                                                                                                                                                                                                                                                                                                                                                                                                                                                                                                                                                                                                                                                                                   |
|---------------------------|--------------------------|---------|--------------------------------------------------------------------------------------------------------------------------------------------------------------------------------------------------------------------------------------------------------------------------------------------------------------------------------------------------------------------------------------------------------------------------------------------------------------------------------------------------------------------------------------------------------------------------------------------------------------------------------------------------------------------------------------------------|
| ✓ page 1 - 3              | Title and abstract       | 1       | (a) Indicate the study's design with a commonly used term in the title or the abstract<br>(b) Provide in the abstract an informative and balanced summary of what was done and what was found                                                                                                                                                                                                                                                                                                                                                                                                                                                                                                    |
| <b>Introduction</b>       |                          |         |                                                                                                                                                                                                                                                                                                                                                                                                                                                                                                                                                                                                                                                                                                  |
| ✓ page 4-5                | Background/rationale     | 2       | Explain the scientific background and rationale for the investigation being reported                                                                                                                                                                                                                                                                                                                                                                                                                                                                                                                                                                                                             |
| ✓ page 4-5                | Objectives               | 3       | State specific objectives, including any prespecified hypotheses                                                                                                                                                                                                                                                                                                                                                                                                                                                                                                                                                                                                                                 |
| <b>Methods</b>            |                          |         |                                                                                                                                                                                                                                                                                                                                                                                                                                                                                                                                                                                                                                                                                                  |
| ✓ page 5-7                | Study design             | 4       | Present key elements of study design early in the paper                                                                                                                                                                                                                                                                                                                                                                                                                                                                                                                                                                                                                                          |
| ✓ page 5-7                | Setting                  | 5       | Describe the setting, locations, and relevant dates, including periods of recruitment, exposure, follow-up, and data collection                                                                                                                                                                                                                                                                                                                                                                                                                                                                                                                                                                  |
| ✓ page 5-7                | Participants             | 6       | (a) <i>Cohort study</i> —Give the eligibility criteria, and the sources and methods of selection of participants. Describe methods of follow-up<br><i>Case-control study</i> —Give the eligibility criteria, and the sources and methods of case ascertainment and control selection. Give the rationale for the choice of cases and controls<br><i>Cross-sectional study</i> —Give the eligibility criteria, and the sources and methods of selection of participants<br>(b) <i>Cohort study</i> —For matched studies, give matching criteria and number of exposed and unexposed<br><i>Case-control study</i> —For matched studies, give matching criteria and the number of controls per case |
| ✓ page 5-7                | Variables                | 7       | Clearly define all outcomes, exposures, predictors, potential confounders, and effect modifiers. Give diagnostic criteria, if applicable                                                                                                                                                                                                                                                                                                                                                                                                                                                                                                                                                         |
| ✓ page 5-7                | Data sources/measurement | 8*      | For each variable of interest, give sources of data and details of methods of assessment (measurement). Describe comparability of assessment methods if there is more than one group                                                                                                                                                                                                                                                                                                                                                                                                                                                                                                             |
| ✓ page 5-7                | Bias                     | 9       | Describe any efforts to address potential sources of bias                                                                                                                                                                                                                                                                                                                                                                                                                                                                                                                                                                                                                                        |
| ✓ page 5-7                | Study size               | 10      | Explain how the study size was arrived at                                                                                                                                                                                                                                                                                                                                                                                                                                                                                                                                                                                                                                                        |
| ✓ page 5-7                | Quantitative variables   | 11      | Explain how quantitative variables were handled in the analyses. If applicable, describe which groupings were chosen and why                                                                                                                                                                                                                                                                                                                                                                                                                                                                                                                                                                     |
| ✓ page 5-7                | Statistical methods      | 12      | (a) Describe all statistical methods, including those used to control for confounding<br>(b) Describe any methods used to examine subgroups and interactions<br>(c) Explain how missing data were addressed<br>(d) <i>Cohort study</i> —If applicable, explain how loss to follow-up was addressed                                                                                                                                                                                                                                                                                                                                                                                               |

*Case-control study*—If applicable, explain how matching of cases and controls was addressed

*Cross-sectional study*—If applicable, describe analytical methods taking account of sampling strategy

(e) Describe any sensitivity analyses

## Results

|                          |                  |     |                                                                                                                                                                                                                                                                                                                                                                                                               |
|--------------------------|------------------|-----|---------------------------------------------------------------------------------------------------------------------------------------------------------------------------------------------------------------------------------------------------------------------------------------------------------------------------------------------------------------------------------------------------------------|
| ✓ page 7-10              | Participants     | 13* | (a) Report numbers of individuals at each stage of study—eg numbers potentially eligible, examined for eligibility, confirmed eligible, included in the study, completing follow-up, and analysed<br>(b) Give reasons for non-participation at each stage<br>(c) Consider use of a flow diagram                                                                                                               |
| ✓ page 7-10              | Descriptive data | 14* | (a) Give characteristics of study participants (eg demographic, clinical, social) and information on exposures and potential confounders<br>(b) Indicate number of participants with missing data for each variable of interest<br>(c) <i>Cohort study</i> —Summarise follow-up time (eg, average and total amount)                                                                                           |
| ✓ page 7-10              | Outcome data     | 15* | <i>Cohort study</i> —Report numbers of outcome events or summary measures over time<br><i>Case-control study</i> —Report numbers in each exposure category, or summary measures of exposure<br><i>Cross-sectional study</i> —Report numbers of outcome events or summary measures                                                                                                                             |
| ✓ page 7-10              | Main results     | 16  | (a) Give unadjusted estimates and, if applicable, confounder-adjusted estimates and their precision (eg, 95% confidence interval). Make clear which confounders were adjusted for and why they were included<br>(b) Report category boundaries when continuous variables were categorized<br>(c) If relevant, consider translating estimates of relative risk into absolute risk for a meaningful time period |
| ✓ page 7-10              | Other analyses   | 17  | Report other analyses done—eg analyses of subgroups and interactions, and sensitivity analyses                                                                                                                                                                                                                                                                                                                |
| <b>Discussion</b>        |                  |     |                                                                                                                                                                                                                                                                                                                                                                                                               |
| ✓ page 10-11             | Key results      | 18  | Summarise key results with reference to study objectives                                                                                                                                                                                                                                                                                                                                                      |
| ✓ page 3,11              | Limitations      | 19  | Discuss limitations of the study, taking into account sources of potential bias or imprecision. Discuss both direction and magnitude of any potential bias                                                                                                                                                                                                                                                    |
| ✓ page 10-11             | Interpretation   | 20  | Give a cautious overall interpretation of results considering objectives, limitations, multiplicity of analyses, results from similar studies, and other relevant evidence                                                                                                                                                                                                                                    |
| ✓ page 10-11             | Generalisability | 21  | Discuss the generalisability (external validity) of the study results                                                                                                                                                                                                                                                                                                                                         |
| <b>Other information</b> |                  |     |                                                                                                                                                                                                                                                                                                                                                                                                               |
| ✓ page 12                | Funding          | 22  | Give the source of funding and the role of the funders for the present study and, if applicable, for the original study on which the present article is based                                                                                                                                                                                                                                                 |

\*Give information separately for cases and controls in case-control studies and, if applicable, for exposed and unexposed groups in cohort and cross-sectional studies.

1  
2  
3  
4 **Note:** An Explanation and Elaboration article discusses each checklist item and gives methodological background and  
5 published examples of transparent reporting. The STROBE checklist is best used in conjunction with this article (freely  
6 available on the Web sites of PLoS Medicine at <http://www.plosmedicine.org/>, Annals of Internal Medicine at  
7 <http://www.annals.org/>, and Epidemiology at <http://www.epidem.com/>). Information on the STROBE Initiative is  
8 available at [www.strobe-statement.org](http://www.strobe-statement.org).  
9  
10  
11  
12  
13  
14  
15  
16  
17  
18  
19  
20  
21  
22  
23  
24  
25  
26  
27  
28  
29  
30  
31  
32  
33  
34  
35  
36  
37  
38  
39  
40  
41  
42  
43  
44  
45  
46  
47  
48  
49  
50  
51  
52  
53  
54  
55  
56  
57  
58  
59  
60

For peer review only
